1 **Measuring NDC80 binding reveals the molecular basis of tension-dependent**  
2 **kinetochore-microtubule attachments**

3

4 **AUTHORS:** Tae Yeon Yoo<sup>1,\*</sup>, Jeong-Mo Choi<sup>2</sup>, William Conway<sup>3</sup>, Che-Hang Yu<sup>4</sup>, Rohit V. Pappu<sup>2</sup>, and  
5 Daniel J. Needleman<sup>1,4</sup>

6

7 **AFFILIATIONS:**

8 <sup>1</sup>Department of Molecular and Cellular Biology and Faculty of Arts and Sciences Center for Systems  
9 Biology, Harvard University, Cambridge, MA 02138, USA

10 <sup>2</sup>Department of Biomedical Engineering and Center for Biological Systems Engineering, Washington  
11 University in St. Louis, St. Louis, MO 63130, USA

12 <sup>3</sup>Department of Physics, Harvard University, Cambridge, MA 02138, USA

13 <sup>4</sup>John A. Paulson School of Engineering and Applied Sciences, Harvard University, Cambridge, MA  
14 02138, USA.

15 \*Correspondence: tyoo@fas.harvard.edu

16

17 **Abstract:** Proper kinetochore-microtubule attachments, mediated by the NDC80 complex, are required  
18 for error-free chromosome segregation. Erroneous attachments are corrected by the tension dependence of  
19 kinetochore-microtubule interactions. Here, we present a method, based on fluorescence lifetime imaging  
20 microscopy and Förster resonance energy transfer, to quantitatively measure the fraction of NDC80  
21 complexes bound to microtubules at individual kinetochores in living human cells. We found that NDC80  
22 binding is modulated in a chromosome autonomous fashion over prometaphase and metaphase, and is  
23 predominantly regulated by centromere tension. We show that this tension dependency requires  
24 phosphorylation of the N-terminal tail of Hec1, a component of the NDC80 complex, and the proper  
25 localization of Aurora B kinase, which modulates NDC80 binding. Our results lead to a mathematical

1 model of the molecular basis of tension-dependent NDC80 binding to kinetochore microtubules in vivo.

2

### 3 **INTRODUCTION**

4 Chromosome segregation errors lead to aneuploidy and micronuclei formation, which are closely  
5 associated with cancer, infertility, and birth defects (Santaguida and Amon, 2015). Accurate chromosome  
6 segregation is believed to result from a process that actively suppresses potential errors. The mechanism  
7 of error correction remains unclear, but extensive evidence suggests that it is based on the regulation of  
8 the attachment of microtubules to chromosome via the kinetochore, a protein complex assembled at  
9 centromeres (Godek et al., 2015). Previous works suggested that error correction is largely due to the  
10 detachment of kinetochore microtubules (kMTs) being regulated by the tension across centromeres,  
11 which selectively destabilizes erroneous kMT attachments bearing low tension and stabilizes proper  
12 attachments under high tension (Nicklas and Ward, 1994, Liu et al., 2009, Akiyoshi et al., 2010, Lampson  
13 and Cheeseman, 2011, Godek et al., 2015). However, the molecular mechanism of the tension-dependent  
14 regulation of kMT attachments is still poorly understood.

15         The highly conserved NDC80 complex is the major coupler of the kinetochore to microtubules  
16 (Cheeseman et al., 2006, DeLuca et al., 2006). In human mitotic cells, ~240 NDC80 complexes are  
17 recruited at the outer layer of each kinetochore (Suzuki et al., 2015) and interact with ~20 kMTs by  
18 directly binding to them (Cheeseman and Desai, 2008, Maiato et al., 2004, Rieder, 1982). In vitro  
19 experiments showed that the binding affinity of NDC80 for microtubules decreases upon the  
20 phosphorylation of the N-terminal tail of Ndc80/Hec1 protein by Aurora B kinase (Cheeseman et al.,  
21 2006, Zaytsev et al., 2014, Zaytsev et al., 2015), which may explain the contribution of Aurora B to error  
22 correction (Tanaka et al., 2002). It is unclear how the biochemical activities of NDC80 and Aurora B  
23 result in tension-dependent kMT detachment. The lack of techniques to measure the binding of the  
24 NDC80 to kMTs in vivo has been a major obstacle to investigate this.

25

## 1 **RESULTS**

### 2 **FLIM-FRET measures the fraction of donor-labeled NDC80 complexes engaged in FRET with** 3 **acceptor-labeled microtubules**

4 Inspired by previous work (Posch et al., 2010), we sought to develop a Förster Resonance Energy  
5 Transfer (FRET) based approach to directly measure the association between the NDC80 complex and  
6 kinetochore microtubules (kMTs) in living cells. We engineered U2OS cells stably expressing Nuf2, a  
7 subunit of the NDC80 complex, N-terminally labeled with a cyan fluorescent protein, mTurquoise2  
8 (Figure 1A). In this same cell line, we also inserted a tetracysteine (TC) motif at the C-terminus of  $\beta$ -  
9 tubulin (TUBB) using CRISPR-induced homologous recombination, which becomes fluorescent after  
10 binding to the membrane-permeable dye FAsH (Hoffmann et al., 2005) (Figure 1A and B). The small  
11 size (six amino acids) of the TC motif minimizes the negative effects of labeling the C-terminus of  
12 tubulin, allowing the engineered cells to successfully pass through mitosis (Andresen et al., 2004).  
13 CRISPR-mediated endogenous tubulin tagging ensures low cell-to-cell variation and a high fraction of  
14 labeled  $\beta$ -tubulin, which was estimated to be  $26.1\% \pm 5.4\%$  (SD) (Figure 1—figure supplement 1 and see  
15 Supplemental experiments in Materials and Methods).

16 We used time-correlated single photon counting (TCSPC) fluorescence lifetime imaging  
17 microscopy (FLIM) to quantitatively measure FRET between mTurquoise2 and TC-FAsH in tissue  
18 culture cells (Figure 1—figure supplement 2). TCSPC FLIM-FRET provides fluorescence decay curves of  
19 the donor fluorophore at each pixel location. If a donor fluorophore has a single-exponential fluorescence  
20 decay curve when not engaged in FRET, then when it is engaged in FRET the fluorescence decay curve  
21 will also be single-exponential, but with a shorter lifetime. A pixel containing a mixture of such donor  
22 fluorophores engaged in FRET and not engaged in FRET displays a fluorescence decay curve that is a  
23 sum of two exponentials. Bayesian analysis of the fluorescence decay curves provides a bias-free  
24 measurement of the relative fraction of the two exponentials, and hence the fraction of donor fluorophores  
25 engaged in FRET (Yoo and Needleman, 2016, Kaye et al., 2017). In contrast to intensity-based FRET

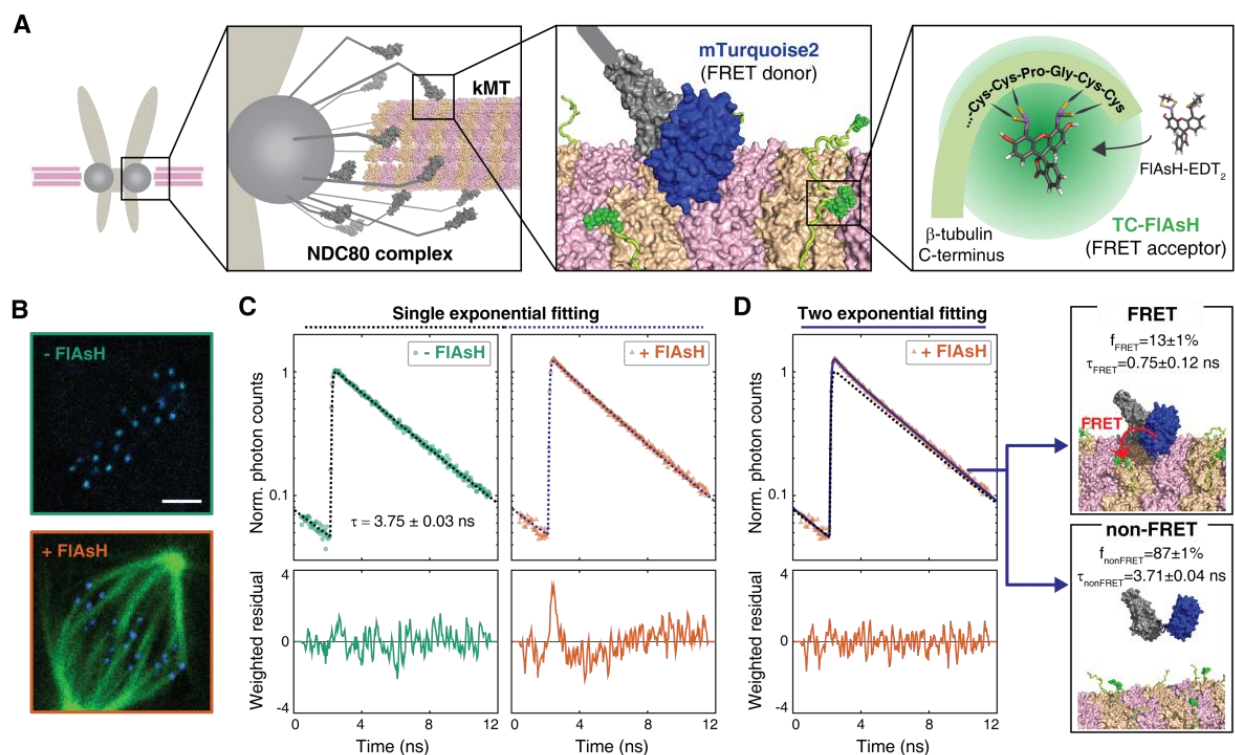

1  
2 **Figure 1. FLIM-FRET measurement of NDC80-kMT binding in human tissue culture cells.**  
3 (A) Engineered U2OS cell expressing mTurquoise2-NDC80 and  $\beta$ -tubulin-TC-FIAsH. NDC80 (gray),  
4 mTurquoise2 (blue) and TC-FIAsH (green).  
5 (B) Two-photon microscopy images of the engineered U2OS cells not exposed to FIAsH (top) and  
6 exposed to FIAsH (bottom). 3  $\mu$ m scale bar. mTurquoise2 (blue) and FIAsH (green).  
7 (C) Example fluorescence decay curves of mTurquoise2-NDC80 in the engineered U2OS cells not  
8 exposed to FIAsH (left, green circle) and exposed to FIAsH (right, orange triangle), plotted with the best-  
9 fit single-exponential decay models (black and blue dotted lines). Corresponding weighted residuals (the  
10 deviation of data from model, divided by the square root of the number of photons) are plotted below  
11 after being smoothed to display systematic deviations.  
12 (D) The fluorescence decay curve of mTurquoise2-NDC80 in the presence of FIAsH labeling (orange  
13 triangle, same as (C)), plotted with the best-fit two-exponential model (blue solid line). The single-  
14 exponential model fit to the fluorescence decay curve in the absence of FIAsH labeling (black dotted line)  
15 plotted together for comparison. Corresponding smoothed weighted residual (described above) for the  
16 two-exponential model is plotted below. Long- and short-lifetime exponentials correspond to the  
17 mTurquoise2-NDC80 populations in non-FRET state and FRET state, respectively, and their relative  
18 amplitudes give the fraction of each population. To facilitate the comparison, the fluorescence decay  
19 curves in the absence and presence of FIAsH labeling were normalized such that they asymptotically  
20 overlap.  
21 Data points and source FLIM data are available in Figure1-Data (Yoo et al.).

1 methods, FLIM-FRET is capable of quantifying the fraction of donor fluorophores engaged in FRET  
2 when donors and acceptors are differentially distributed in cells, and it is less prone to errors arising from  
3 instrumental artefacts and photobleaching (Berezin and Achilefu, 2010).

4 We first characterized the fluorescence decay of mTurquoise2-NDC80 in the absence of FRET by  
5 performing FLIM measurement on the engineered U2OS cells (mTurquoise2-NDC80/ $\beta$ -tubulin-TC) that  
6 were not exposed to FIAsh (Figure 1B, top). We found that their fluorescence decays are well described  
7 as a single exponential with a lifetime of  $3.75 \text{ ns} \pm 0.09 \text{ ns}$  (SD) (Figure 1C, left, and Figure 1–figure  
8 supplement 3A). As discussed above, this single exponential decay profile is expected when the donor  
9 fluorophores do not engage in FRET. We next measured the fluorescence decay of the mTurquoise2-  
10 NDC80 in the presence of FIAsh labeling of microtubules. In this case, a single exponential provided a  
11 poor fit to the data, exhibiting significant systematic deviations (Figure 1C, right). The fluorescence decay  
12 in the presence of FIAsh labeling was well fit by a sum of two exponentials with lifetimes  $3.71 \text{ ns} \pm 0.04$   
13  $\text{ns}$  (SE) and  $0.75 \text{ ns} \pm 0.12 \text{ ns}$  (SE) (Figure 1D). The long lifetime of the two-exponential fit was  
14 indistinguishable from the lifetime in the absence of FRET ( $p = 0.68$ , two-sided Z-test), and thus  
15 corresponds to the non-FRET donor population. Therefore, the short-lifetime species is the FRET donor  
16 population. The relative amplitude of the short- and long-lifetime exponentials are  $0.13 \pm 0.01$  (SE) and  
17  $0.87 \pm 0.01$  (SE), respectively, thus  $13\% \pm 1\%$  (SE) of donor fluorophores are engaged in FRET.

18

### 19 **FRET between mTurquoise2-NDC80 and FIAsh results from the NDC80-kMT binding**

20 Having demonstrated our ability to measure FRET between mTurquoise2-NDC80 and FIAsh in tissue  
21 culture cells, we explored if the FRET is due to the binding of NDC80 to kMTs. We first engineered an  
22 alternative construct with mTurquoise2 conjugated to the distally located C-terminus of Nuf2, far  
23 removed from kMTs. This alternative construct displayed only a single long-lifetime state in either the  
24 presence or absence of TC-FIAsh, arguing that FRET does not result from non-specific interactions  
25 (Figure 1–figure supplement 3B, C and E). Incubating cells with nocodazole to depolymerize

1 microtubules caused a reduction ( $p < 10^{-10}$ , two-sided Z-test) of NDC80 FRET fraction from  $13\% \pm 1\%$   
2 (SE) to  $3\% \pm 1\%$  (SE) (Figure 1–figure supplement 3D). Thus, FRET strongly depends on the presence of  
3 microtubules.

4 We next investigated if NDC80 that is close to kMTs, but not bound to them, can lead to  
5 appreciable FRET. Answering this requires knowing the Förster radius between mTurquoise2 and TC-  
6 FAsH, which we determined to be  $5.90 \pm 0.10$  nm (SE) through a combination of FLIM measurements  
7 and Monte Carlo simulations (see Figure 1–figure supplement 4 and Supplemental experiments in  
8 Materials and Methods). We next performed large-scale Monte Carlo simulations of mTurquoise2-  
9 NDC80 at various distances between the calponin homology (CH) domain of Hec1/Ndc80 protein (the  
10 NDC80 complex’s microtubule binding domain adjacent to mTurquoise2 (Alushin et al., 2010)) and  
11 FAsH-labeled microtubules and simulated the fluorescence decay curves, which revealed that NDC80  
12 more than 8 nm away from the kMT do not contribute to the short-lifetime FRET state (Figure 1–figure  
13 supplement 5A and B). Thus, FRET only results when the CH domain of Hec1 is very close to the surface  
14 of kMTs, consistent with the short-lifetime species being NDC80 complexes whose Hec1 CH domains  
15 are bound to kMTs, an interpretation further supported by biological perturbation experiments described  
16 below.

17 Even though FRET results only from NDC80 bound to kMTs, the measured FRET fraction is not  
18 identical to the fraction of NDC80 bound to kMTs because not all tubulin heterodimers are labeled with  
19 TC-FAsH. Using large scale Monte Carlo simulations of mTurquoise2-NDC80 bound to FAsH-labeled  
20 microtubules, we generated fluorescence decay curves for various NDC80 binding fractions, and  
21 estimated the resulting NDC80 FRET fractions from a fit to a two-exponential decay (see Figure 1–figure  
22 supplement 5C and Supplemental experiments in Materials and Methods). We found that the NDC80  
23 FRET fraction increases linearly with the NDC80 binding fraction with a slope of  $0.42 \pm 0.08$ , indicating  
24 that 42% of attached mTurquoise2-NDC80 contribute to the short-lifetime FRET state (Figure 1–figure

1 supplement 5C). Thus, the measured FRET fraction of 13% in Figure 1D corresponds to 31% of NDC80  
2 complexes being bound to kMTs.

3  
4 **NDC80-kMT binding is regulated in a chromosome-autonomous fashion throughout prometaphase**

5 Using the FLIM-FRET measurements of NDC80-kMT binding, we first investigated how NDC80-kMT  
6 binding evolves over the course of mitosis. We found that the average NDC80-kMT binding gradually  
7 increases as mitosis progresses, with NDC80 FRET fraction rising from 7% in early prometaphase to  
8 14% in late metaphase, and reaching about 18% in anaphase (corresponding to NDC80 binding fractions  
9 of 17% in prometaphase; 33% in late metaphase; and 43% in anaphase) (Figure 2A). This temporal  
10 change in NDC80-kMT binding may underlie the previously observed decrease in kMT turnover  
11 throughout mitosis (Kabeche and Compton, 2013, Zhai et al., 1995).

12 The change in the average NDC80-kMT binding over the course of error correction in  
13 prometaphase could be due to a cell cycle-dependent coordinated regulation of NDC80 across  
14 kinetochores (coordinated regulation), an independent modulation of NDC80 on different chromosomes  
15 (chromosome-autonomous regulation), or a combination of both. To investigate the contribution of  
16 chromosome-autonomous regulation, we sought to determine if different populations of kinetochores in  
17 prometaphase exhibit different NDC80-kMT binding. We compared the extent of the NDC80-kMT  
18 binding of kinetochores centered at the metaphase plate to those located off-centered (Figure 2B), and  
19 found that the centered kinetochores exhibit  $2.0 \pm 0.4$  times higher NDC80 binding than the off-centered  
20 kinetochores. We next investigated how the NDC80-kMT binding of centered and off-centered  
21 kinetochores change with time in prometaphase. As mitosis progresses and the chromosomes align to the  
22 metaphase plate, the number of kinetochores in the center region increases while the number of  
23 kinetochores in the off-center region decreases (Figure 2C). NDC80-kMT binding continuously increases  
24 over time for the kinetochores located in the center region, but remains constant with the FRET fraction  
25 of ~7% for the kinetochores in the off-center region (Figure 2D). The observation of differences in

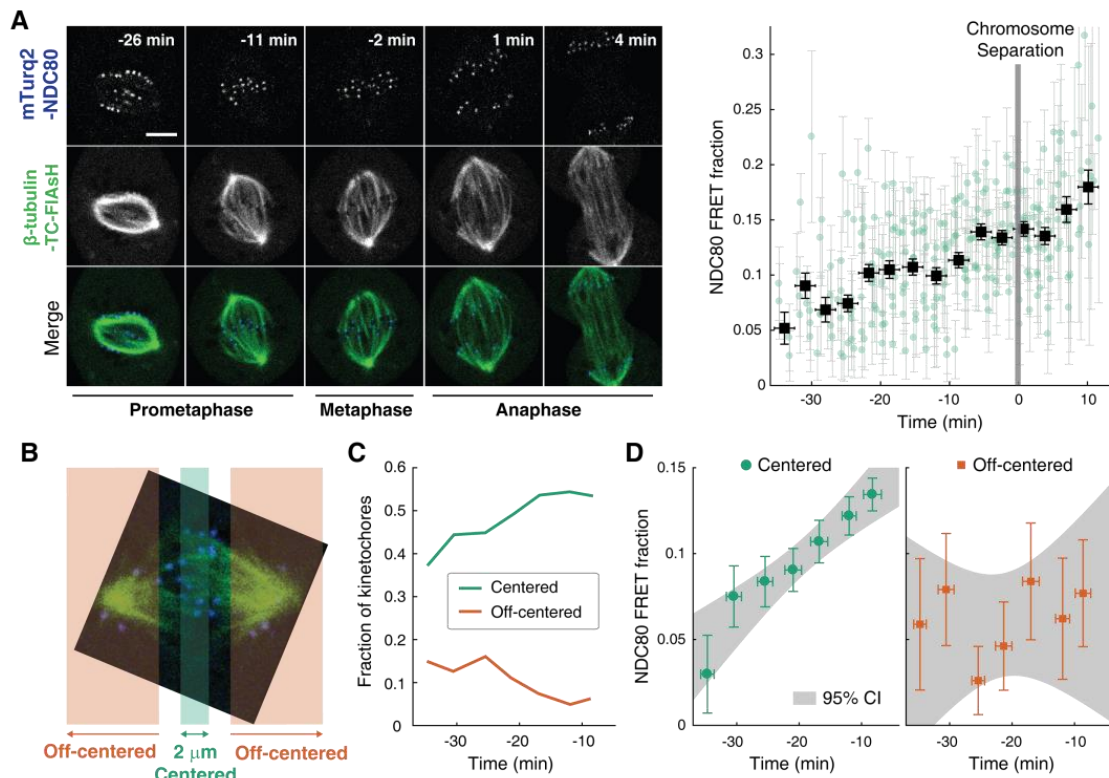

1  
2 **Figure 2. NDC80-kMT binding is regulated in a chromosome-autonomous fashion.**  
3 (A) Example cell images and time course of NDC80 FRET fraction from prometaphase to metaphase to  
4 anaphase ( $n = 11$  cells). Black squares are the mean, y-error bars are the SEM, and x-error bars are the SD  
5 of the data points (green circles) in equally spaced time intervals. 5  $\mu$ m scale bar.  
6 (B) Kinetochores at each time point in prometaphase cells are divided into two groups, centered and off-  
7 centered, based on their distances from the metaphase plate. Kinetochores less than 1  $\mu$ m away from the  
8 metaphase plate were classified as centered, and kinetochores more than 2.5  $\mu$ m away were classified as  
9 off-centered.  
10 (C) Time course of the fraction of centered (green) and off-centered (orange) kinetochores in  
11 prometaphase.  
12 (D) Time course of NDC80 FRET fraction of centered (green circles) and off-centered (orange squares)  
13 kinetochores in prometaphase ( $n = 11$  cells, 2886 centered and 572 off-centered kinetochores). Data  
14 points are the mean, y-error bars the SEM, and the x-error bars the SD in equally spaced time intervals.  
15 Gray areas are the 95% confidence intervals for the linear fits.  
16 Data points and source FLIM data are available in Figure2-Data (Yoo et al.).



1 NDC80 binding between different subpopulations of kinetochores strongly argues for the existence of  
2 chromosome-autonomous regulation, which might be modulated by tension, Aurora kinases A and B,  
3 pathways that control the conversion of lateral to end-on kMT attachments, or other factors (Godek et al.,  
4 2015, DeLuca et al., 2018). We speculate that the temporal increase in NDC80-kMT binding of centered  
5 kinetochores is due to the gradual decrease in the number of kinetochores with erroneous attachment that  
6 transiently lie on the metaphase plate (Magidson et al., 2011). The constant NDC80-kMT binding of off-  
7 centered kinetochores argues for a lack of temporal regulation of this subpopulation.

8

### 9 **NDC80-kMT binding is positively correlated with centromere tension**

10 After demonstrating that different population of kinetochores exhibits different NDC80-kMT binding  
11 throughout prometaphase, we next investigated the factors contributing to chromosome-autonomous  
12 regulation of the interaction between NDC80 and kMTs. Aligned chromosomes in U2OS cells oscillate  
13 around the metaphase plate, with microtubules attached to the leading and trailing kinetochores primarily  
14 depolymerizing and polymerizing, respectively (Tirnauer et al., 2002, Armond et al., 2015) (Figure 3A).  
15 The distance between sister kinetochores (referred to as K-K distance) fluctuates during the oscillation  
16 (Magidson et al., 2011), as the centromere deforms in response to the dynamic change in tension (Figure  
17 3A). Therefore, chromosome oscillation provides a window to study how NDC80 binding is related to  
18 kMT dynamics and centromere tension in a physiologically relevant condition.

19 We first asked whether NDC80 binding is different on leading and trailing kinetochores. We  
20 acquired time-lapse movies of 17 metaphase cells, tracked their kinetochores, identified sister  
21 kinetochores by their relative motions (Figure 3B), and quantified the NDC80 binding fraction in groups  
22 of kinetochores with similar velocities using FLIM-FRET analysis. We found that the NDC80 FRET  
23 fraction is higher at trailing kinetochores ( $12.8\% \pm 0.5\%$ , SEM) than leading kinetochores ( $11.4\% \pm$   
24  $0.5\%$ , SEM), regardless of their speeds (Figure 3C), suggesting that NDC80 preferentially binds to

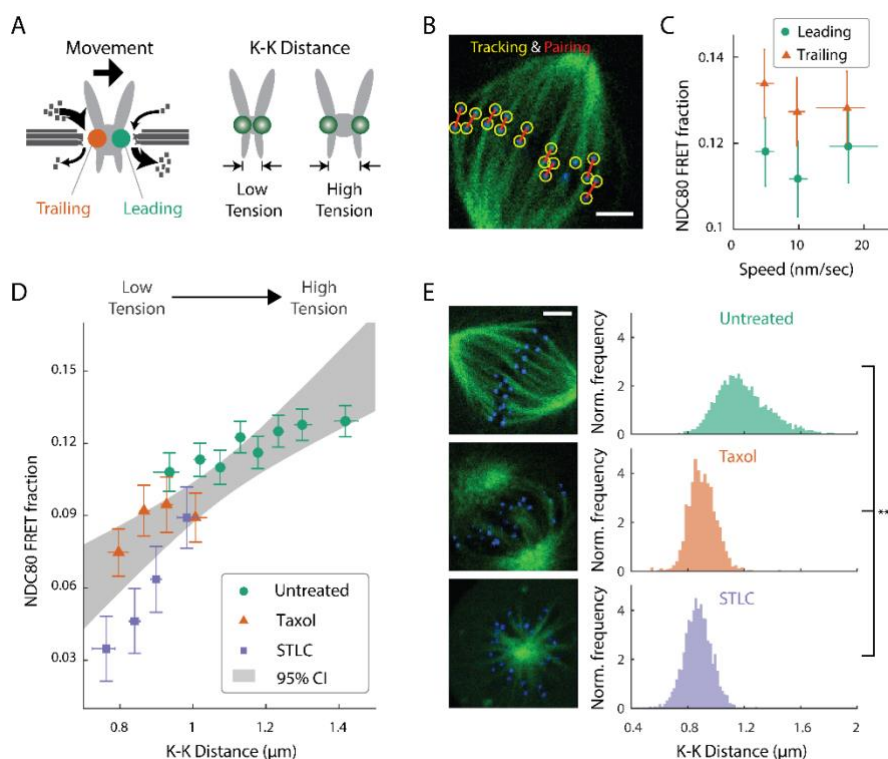

1  
2 **Figure 3. NDC80-kMT binding is correlated with kMT dynamics and centromere tension.**  
3 (A) (left) kMTs predominantly depolymerize at leading kinetochores and polymerize at trailing  
4 kinetochores. (right) K-K distance is a proxy for centromere tension. Measuring NDC80-kMT binding  
5 along with the kinetochore movement and K-K distance therefore reveals how NDC80-kMT binding is  
6 related to the kMT dynamics and centromere tension.  
7 (B) Image of a metaphase cell with mTurquoise2-NDC80 (blue) and  $\beta$ -tubulin-TC-FIAsH (green), and  
8 kinetochore tracking (yellow circles) and pairing (red lines) results. 3  $\mu$ m scale bar.  
9 (C) NDC80 FRET fraction vs. kinetochore speed for leading (green circle) and trailing (orange triangle)  
10 kinetochores (n= 17 cells, 681 kinetochores/data point). Data points are the mean, y-error bars the SEM,  
11 and the x-error bars the interquartile ranges within groups of kinetochores with similar velocities.  
12 (D) NDC80 FRET fraction vs. K-K distance for untreated cells (green circle, n = 17 cells, 984  
13 kinetochores/data point), cells treated with 10  $\mu$ M taxol (orange triangle, n = 7 cells, 525  
14 kinetochores/data point), and cells treated with 5  $\mu$ M STLC (purple square, n = 16 cells, 493  
15 kinetochores/data point). For STLC data, only poleward-facing kinetochores are plotted (see Figure 3-  
16 supplement 2 for comparison between poleward and anti-poleward kinetochores). Data points are the  
17 mean, y-error bars the SEM, and the x-error bars the interquartile ranges within groups of kinetochores  
18 with similar K-K distances. Gray area is the 95% confidence interval for the linear fit to the combined  
19 data.  
20 (E) Histograms of K-K distances for the untreated (top, green), taxol-treated (middle, orange)-  
21 treated (bottom, purple) cells. 3  $\mu$ m scale bar in the cell images of mTurquoise2-NDC80 (blue) and beta-  
22 tubulin-TC-FIAsH (green). \*\*\*: p-value (Welch's t-test) less than  $10^{-30}$ .  
23 Data points and source FLIM data are available in Figure3-Data (Yoo et al.).

1 polymerizing kMTs in vivo. The preferential binding is statistically significant ( $p < 0.02$ , two-sided Z-test),  
2 yet small, presumably because leading and trailing kinetochores have a mixture of both polymerizing and  
3 depolymerizing MTs (Armond et al., 2015). This differential binding of NDC80 provides an explanation  
4 for the higher detachment rate of depolymerizing microtubules from kinetochores in vitro (Akiyoshi et al.,  
5 2010), and may give insight into the nature of kMT attachments (Dumont et al., 2012).

6         The detachment rate of kMTs from kinetochores was shown to be reduced when tension was  
7 increased using glass needles in classic micromanipulation experiments by Bruce Nicklas (Nicklas and  
8 Koch, 1969). Since the NDC80 complex is the predominant coupler of the kinetochore to microtubules  
9 (Cheeseman et al., 2006, DeLuca et al., 2006), we hypothesized that the tension-dependent detachment of  
10 kMTs results from tension-dependent NDC80-kMT binding. To test this possibility, we next investigated  
11 the correlation between NDC80 FRET fraction and centromere tension, inferred by K-K distance, during  
12 chromosome oscillations. We used FLIM-FRET analysis to measure the NDC80 binding in groups of  
13 sister kinetochores with similar K-K distances, and observed a highly statistically significant positive  
14 correlation ( $p < 0.005$ ) between NDC80 FRET fraction and K-K distance (Figure 3D). We observed no  
15 significant correlation between K-K distance and kinetochore velocity ( $p = 0.75$ ), arguing that NDC80  
16 binding is independently regulated by these two factors (Figure 3—figure supplement 1). In the absence of  
17 microtubules, the rest length of K-K distance in human cell is  $0.73 \mu\text{m} \pm 0.04 \mu\text{m}$  (Tauchman et al.,  
18 2015), significantly shorter than the K-K distances during metaphase oscillations. Thus, in order to  
19 investigate a wider range of K-K distance, we treated cells with taxol, a microtubule-stabilizing drug,  
20 which greatly reduced K-K distances ( $0.90 \mu\text{m} \pm 0.10 \mu\text{m}$ , taxol vs.  $1.19 \mu\text{m} \pm 0.19 \mu\text{m}$ , untreated, SD,  
21  $p < 10^{-30}$ ) (Figure 3E) as well as NDC80 FRET fraction (Figure 3D). As an alternative way to reduce the  
22 tension, we inhibited Eg5 with  $5 \mu\text{M}$  S-trityl-L-cysteine (STLC) (Skoufias et al., 2006). STLC-treated  
23 cells form monopolar spindles with reduced K-K distances ( $0.87 \mu\text{m} \pm 0.10 \mu\text{m}$ , SD,  $p < 10^{-30}$ ) (Figure 3E).  
24 In these monopolar spindles, NDC80 FRET fractions from poleward-facing kinetochores was positively  
25 correlated with the K-K distance ( $p < 0.05$ ), while anti-poleward-facing kinetochores displayed reduced

1 NDC80 FRET fraction with no significant correlation with K-K distance ( $p=0.46$ ), presumably because  
2 many of these kinetochores are monotelically attached from the poleward side (Figure 3-figure  
3 supplement 2). The correlation between NDC80 FRET fraction and K-K distance was similar between  
4 taxol- and STLC-treated cells ( $p=0.15$ , see Figure 3D), arguing that the relation between NDC80 FRET  
5 fraction and K-K distance is insensitive to the precise perturbation used to reduce tension. Combining the  
6 data of untreated, taxol-treated and STLC-treated (only poleward-facing kinetochores) cells, we found  
7 that the NDC80 FRET fraction continually increases with K-K distance over the full range of K-K  
8 distance (positive correlation,  $p<0.00005$ ) (Figure 3D). The extent of variation of NDC80-kMT binding  
9 with K-K distance is comparable to the extent of variation over the course of mitosis, from prometaphase  
10 to anaphase onset, as well as the extent of difference between centered and off-centered kinetochores in  
11 late prometaphase (compare Figure 3D with 2A and D).

12

### 13 **Aurora B kinase regulates NDC80-kMT binding in a graded fashion in vivo**

14 Aurora B kinase is one of the best characterized components of the error correction process, and  
15 the N-terminal tail of the Hec1/Ndc80 protein in the NDC80 complex is a known substrate of Aurora B  
16 kinase that contains nine phosphorylation sites (Tanaka et al., 2002, Biggins et al., 1999, Cheeseman et  
17 al., 2006, DeLuca et al., 2006, Ciferri et al., 2008, Hauf et al., 2003). Previous biochemistry experiments  
18 demonstrated that the phosphorylation state of Hec1 modulates its binding to microtubules in vitro  
19 (Cheeseman et al., 2006, Zaytsev et al., 2014, Zaytsev et al., 2015). We used our FLIM-FRET technique  
20 to investigate the relationship between Aurora B kinase activity and NDC80-kMT binding in cells. We  
21 first added the ATP-competitive Aurora B inhibitor, ZM447439, to late prometaphase cells, and observed  
22 a gradual increase in NDC80 FRET fraction over ~10 minutes, from 9% to nearly 18% (corresponding to  
23 21% NDC80 binding fraction before Aurora B inhibition and 43% after the inhibition) (Figure 4A and  
24 Figure 4-figure supplement 1A). Thus, Aurora B is a major modulator of NDC80-kMT binding in cells.  
25 This modulation of NDC80-kMT binding could occur directly, through phosphorylation of the N-terminal

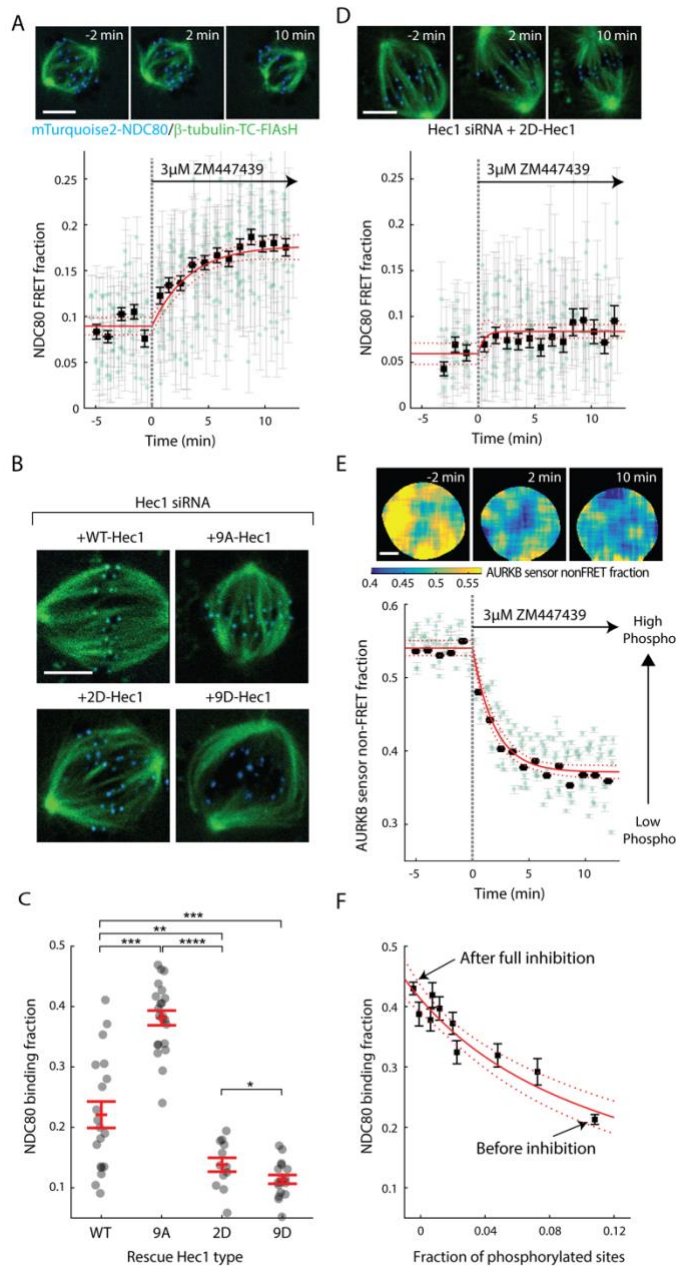

1  
2 **Figure 4. Aurora B kinase regulates NDC80-kMT binding in a graded fashion in vivo.**  
3 (A) (top) Cell images showing mTurquoise2-NDC80 (blue) and beta-tubulin-TC-FIAsH (green). (bottom)  
4 Time course of NDC80 FRET fraction in response to Aurora B inhibition by 3 μM ZM447439 (n = 15  
5 cells).  
6 (B) Images of cells with mTurquoise2-NDC80 (blue) and beta-tubulin-TC-FIAsH (green) after depleting  
7 endogenous Hec1 by siRNA and expressing siRNA-insensitive WT or three different phosphomimetic  
8 mutants of Hec1: 9A-, 2D-, and 9D-Hec1 (see Methods).  
9 (C) NDC80 binding fraction of cells whose endogenous Hec1 are replaced with WT or phosphomimetic  
10 Hec1 (see Methods). Black dots are from individual cells and red error bars are mean ± SEM. n = 19, 22,  
11 12, and 17 cells for WT-, 9A-, 2D-, and 9D-Hec1. \*: p<0.1; \*\*: p<0.01; \*\*\*: p<0.001; \*\*\*\*: p<0.0001.  
12 (D) Time course of NDC80 FRET fraction of 2D-Hec1-expressing cells in response to Aurora B  
13 inhibition by 3 μM ZM447439 (n = 12 cells).

1 (E) (top) Cell images color-coded with Aurora B sensor non-FRET fraction. (bottom) Time course of the  
2 non-FRET fraction of the cytoplasmic Aurora B FRET sensor in response to 3  $\mu$ M ZM447439 (n = 10  
3 cells).  
4 In (A), (D) and (E), black squares and error bars are the weighted mean and SEM of the data points (green  
5 circles) in equally spaced time intervals of 1 minute. Red solid and dashed lines are the best-fit  
6 exponential decay models and their 95% confidence intervals, respectively. 5  $\mu$ m scale bar for all images.  
7 (F) NDC80 binding fraction (converted from NDC80 FRET fraction in (A)) plotted against the fraction of  
8 phosphorylated Aurora B phosphorylation sites in NDC80 (converted from Aurora B FRET sensor non-  
9 FRET fraction in (E)). Red solid and dashed lines are the best-fit NDC80-kMT binding model (derived in  
10 Mathematical modeling in Materials and Methods) and its 95% confidence interval.  
11 Data points and source FLIM data are available in Figure4-Data (Yoo et al.).

1 tail of the Hec1/Ndc80 protein, or indirectly, through other Aurora B substrates which are at kinetochores  
2 or which influence spindle assembly (Carmena et al., 2012, Krenn and Musacchio, 2015). To further  
3 investigate the Aurora B modulation of NDC80 binding, we used non-phosphorylatable mutants of  
4 Hec1/Ndc80 protein, in which all nine identified Aurora B target sites are mutated to either aspartic acid  
5 (a phospho-mimicking mutation) or alanine (a phospho-null mutation) (DeLuca et al., 2011). We replaced  
6 the endogenous Hec1 with wild-type Hec1 or the phosphomimetic mutant of Hec1 by RNAi knockdown  
7 and rescue (Figure 4B, see Methods). The NDC80 binding fraction (converted from NDC80 FRET  
8 fraction) decreased with the number of phospho-mimicking mutations, from  $38\% \pm 1\%$  with 9A-Hec1 (all  
9 nine phosphorylation sites substituted with Ala) to  $14\% \pm 1\%$  with 2D-Hec1 (two sites, S44 and S55,  
10 substituted with Asp while the others with Ala) and to  $11\% \pm 1\%$  with 9D-Hec1 (all nine sites substituted  
11 with Asp) (mean $\pm$ SEM, Figure 4C). The average NDC80 binding of WT-Hec1 was similar, but slightly  
12 higher than 2D-Hec1, consistent with previous results arguing that on average there are zero to two sites  
13 phosphorylated per Hec1/Ndc80 protein in prometaphase and metaphase (Zaytsev et al., 2014).

14 We next sought to determine if the increased binding of NDC80 to kMTs upon Aurora B  
15 inhibition is caused by a change of phosphorylation of the N-terminal tail of Hec1/Ndc80 protein. To this  
16 end, we added the Aurora B inhibitor, ZM447439, to cells with endogenous Hec1 replaced with 2D-Hec1,  
17 whose nine identified Aurora B target sites in the N-terminal tail cannot be phosphorylated. After the  
18 addition of ZM447439, the NDC80 FRET fraction increases by only  $0.02 \pm 0.01$  (SE), which is  
19 statistically significant ( $p < 0.001$ ), but substantially smaller than the increase observed in cells with  
20 endogenous Hec1 ( $0.09 \pm 0.01$  (SE)) (compare Figure 4D to 4A). Thus, the modulation of NDC80  
21 binding to kMTs by Aurora B predominantly occurs through the phosphorylation of the N-terminal tail of  
22 Hec1/Ndc80.

23 We next quantified how Aurora B inhibition influences Aurora B activity in cells. We performed  
24 FLIM measurement on a cytoplasmic Aurora B FRET biosensor (Fuller et al., 2008), which contains a  
25 kinesin-13 family Aurora B substrate whose phosphorylation obstructs intramolecular FRET between

1 mTurquoise2 and YPet (Figure 4–figure supplement 1B). During ZM447439 treatment, we found a  
2 continual reduction in the fraction of the Aurora B sensors in the non-FRET state, a proxy for Aurora B  
3 phosphorylation, from  $0.540 \pm 0.007$  (SEM) to  $0.368 \pm 0.012$  (SEM) (Figure 4E and Figure 4–figure  
4 supplement 1C). Nuf2-targeted Aurora B sensor responded to the ZM447439 treatment with similar  
5 kinetics, arguing that the time scale of response to Aurora B inhibition is insensitive to the spatial location  
6 of the substrate (Figure 4–figure supplement 1D). As the typical time scale of drug uptake is far slower  
7 than typical phosphorylation/dephosphorylation kinetics (Thurber et al., 2014, Huang et al., 1997), it is  
8 reasonable to assume that the phosphorylation level of Aurora B substrate is at steady state at each time  
9 point, so plotting the measured NDC80 binding fraction (converted from FRET fraction) vs.  
10 phosphorylated level (converted from Aurora B sensor non-FRET fraction) at each time point reveals  
11 their relationship. This analysis showed a graded dependence of NDC80-kMT binding on  
12 phosphorylation (Figure 4F), which is consistent with the impact of phosphomimetic Hec1 mutants on  
13 NDC80 binding (compare Figure 4C and 4F) and results from previous in vitro assays (Zaytsev et al.,  
14 2014, Zaytsev et al., 2015). The increased NDC80-kMT binding after Aurora B inhibition may underlie  
15 the reduction in detachment of kMTs from kinetochores after Aurora B inhibition, observed in  
16 photoactivation experiments (Cimini et al., 2006).

17

### 18 **Haspin-dependent centromere-localized Aurora B is responsible for the tension dependency of** 19 **NDC80-kMT binding**

20 Aurora B regulates kinetochore-microtubule interactions, but its contribution to the tension-dependent  
21 stabilization of kinetochore-microtubule attachments is controversial (Campbell and Desai, 2013,  
22 Salimian et al., 2011, Akiyoshi et al., 2010, Liu et al., 2009, Tanaka et al., 2002, Zaytsev et al., 2016,  
23 Godek et al., 2015, Lampson and Cheeseman, 2011, Haase et al., 2017). We next sought to determine if  
24 the correlation between NDC80-kMT binding and centromere tension that we observed (Figure 3D) is  
25 caused by the phospho-regulation of NDC80 by Aurora B. After replacing the endogenous Hec1 protein



1 with 9A-Hec1, which cannot be phosphorylated on the nine mutated target sites, we no longer observed a  
2 significant correlation between NDC80 FRET fraction and K-K distance ( $p=0.20$ ) (Figure 5A). 9A-Hec1-  
3 expressing cells displayed significantly larger K-K distance than unperturbed cells ( $1.36 \mu\text{m} \pm 0.21 \mu\text{m}$ ,  
4 SD,  $p < 10^{-30}$ ) (Figure 5B), consistent with previous studies (Tauchman et al., 2015, Zaytsev et al., 2014).  
5 To investigate a wider range of K-K distance, we treated cells with taxol or STLC (Figure 5-supplement  
6 figure 1A), as described above, and found no correlation over the full range of K-K distance ( $p=0.29$ ,  
7 Figure 5A and B). Since the strong correlation between NDC80 binding and K-K distance (Figure 3D) is  
8 eliminated in the non-phosphorylatable Hec1 mutant 9A-Hec1 (Figure 5A), this argues that the  
9 phosphorylation of the N-terminal tail of Hec1 is responsible for the correlation between NDC80-kMT  
10 binding and K-K distance. As Aurora B is believed to be the primary kinase that phosphorylates the N-  
11 terminal tail, this further suggests that the activity of Aurora B is responsible for the correlation between  
12 NDC80-kMT binding and K-K distance.

13 Aurora B is localized to centromeres in prometaphase and metaphase (Carmena et al., 2012). We  
14 next investigated if this localization is important for the correlation between NDC80-kMT binding and K-  
15 K distance. We used the haspin kinase inhibitor, 5-iodotubercidin (5-ITu), which has previously been  
16 shown to compromise the recruitment of Aurora B to inner-centromeres (Wang et al., 2012) (Figure 5C).  
17 After 10 minutes of exposure of cells to 5-ITu, INCENP, a member of the chromosome passenger  
18 complex (CPC), which also includes Aurora B (Carmena et al., 2012), was drastically reduced at  
19 centromeres (Figure 5D). Treating cells with 5-ITu for over 15 minutes did not significantly alter the  
20 average K-K distance ( $1.16 \mu\text{m} \pm 0.18 \mu\text{m}$ , 5-ITu vs.  $1.19 \mu\text{m} \pm 0.19 \mu\text{m}$ , untreated, SD) or the overall  
21 average fraction of NDC80 bound to kMTs (FRET fraction,  $11.79\% \pm 0.02\%$  5-ITu vs.  $11.87\% \pm 0.02\%$ ,  
22 untreated, SEM), but eliminated the correlation between K-K distance and NDC80-kMT binding ( $p=0.41$ ,  
23 Figure 5E and F). In order to investigate a wider range of K-K distance, we treated cells with both taxol  
24 and 5-ITu or with both STLC and 5-ITu (Figure 5-supplement figure 1B), and found no correlation over  
25 the full range of K-K distance ( $p=0.96$ , Figure 5E and F). Our observation that the mislocalization of

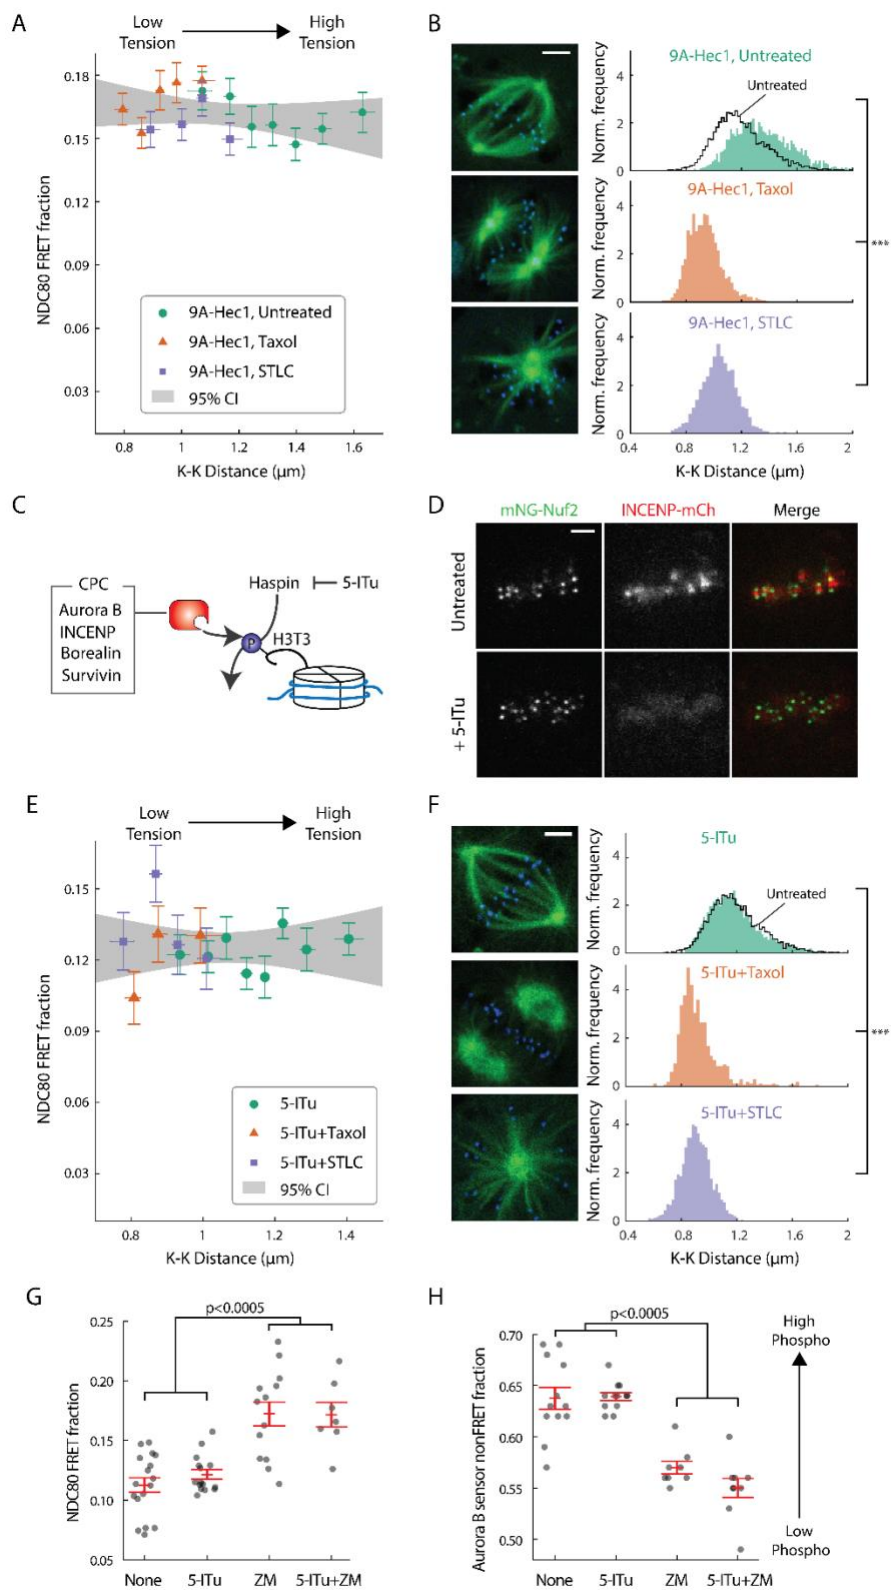

1  
2 **Figure 5. Haspin-dependent centromere-localized Aurora B is responsible for the tension**  
3 **dependency of NDC80-kMT binding**

1 (A) NDC80 FRET fraction vs. K-K distance for 9A-Hec1-expressing cells with no drug treatment (green  
2 circle, n = 12 cells, 803 kinetochores/data point), with 10  $\mu$ M taxol treatment (orange triangle, n = 9 cells,  
3 1113 kinetochores/data point), or with 5  $\mu$ M STLC treatment (purple square, n = 10 cells, 855  
4 kinetochores/data point). For STLC data, only poleward-facing kinetochores are included (see Figure 5-  
5 supplement 1A for comparison between poleward-facing and anti-poleward-facing kinetochores). Data  
6 points are the mean, y-error bars the SEM, and the x-error bars the interquartile ranges within groups of  
7 kinetochores with similar K-K distances. Gray area is the 95% confidence interval for the linear fit to the  
8 combined data.

9 (B) Histograms of K-K distances for the untreated 9A-Hec1 cells (top, green), untreated cells with  
10 endogenous Hec1 (top, black line), 9A-Hec1 cells treated with taxol (middle, orange), and 9A-Hec1 cells  
11 treated with STLC (bottom, purple). 3  $\mu$ m scale bar in the cell images of mTurquoise2-NDC80 (blue) and  
12 beta-tubulin-TC-FIAsH (green). \*\*\*:  $p < 10^{-6}$  (Welch's t-test).

13 (C) Haspin kinase phosphorylates histone H3 at Thr3 (H3T3), which recruits the chromosome passenger  
14 complex (CPC, red) to centromeres. 5-Iodotubercidin (5-ITu) inhibits haspin kinase, thereby displacing  
15 Aurora B from centromeres.

16 (D) Spinning-disk confocal microscopy images of cells expressing mNeonGreen-Nuf2 (green) and  
17 INCENP-mCherry (red) before (top) and after (bottom) haspin inhibition by 10  $\mu$ M 5-ITu treatment. 3  
18  $\mu$ m scale bar.

19 (E) NDC80 FRET fraction vs. K-K distance for cells treated with 10  $\mu$ M 5-ITu (green circle, n = 15 cells,  
20 1170 kinetochores/data point), for cells treated with both 10  $\mu$ M 5-ITu and 10  $\mu$ M taxol (orange triangle,  
21 n = 3 cells, 359 kinetochores/data point), and for cells treated with 10  $\mu$ M 5-ITu and 5  $\mu$ M STLC (purple  
22 square, n = 12 cells, 564 kinetochores/data point). For 5-ITu+STLC data, only poleward-facing  
23 kinetochores are included (see Figure 5-supplement 1B for comparison between poleward-facing and  
24 anti-poleward-facing kinetochores). Data points are the mean, y-error bars the SEM, and the x-error bars  
25 the interquartile ranges within groups of kinetochores with similar K-K distances. Gray area is the 95%  
26 confidence interval for the linear fit to the combined data.

27 (F) Histograms of K-K distances for the 5-ITu-treated (top, green), untreated (top, black line), 5-  
28 ITu+taxol-treated (middle, orange), and 5-ITu+STLC-treated cells (bottom, purple). 3  $\mu$ m scale bar in the  
29 cell images of mTurquoise2-NDC80 (blue) and beta-tubulin-TC-FIAsH (green). \*\*\*:  $p < 10^{-6}$  (Welch's t-  
30 test).

31 (G) NDC80 FRET fraction and (H) the non-FRET fraction of Nuf2-targeted Aurora B FRET sensor  
32 (proxy for Aurora B activity at NDC80) for different drug treatments. Each data point (gray circle)  
33 corresponds to an individual cell, and the error bar (red) shows the mean and SEM. P-values from two-  
34 sided Welch's t-test.

35 Data points and source FLIM data are available in Figure5-Data (Yoo et al.).

1 Aurora B from centromeres does not affect the K-K distance but compromises the correlation between  
2 NDC80 binding and K-K distance argues that the correlation shown in Figure 3D is due to tension  
3 causing an increase in NDC80-kMT binding, rather than NDC80-kMT binding causing an increase in  
4 tension. Moreover, the tension dependency of NDC80-kMT binding in human tissue culture cells depends  
5 on Aurora B recruitment to centromeres by haspin kinase, further arguing in favor of models in which  
6 phosphorylation by Aurora B plays a central role in chromosome autonomous error correction.

7 We were surprised that the average NDC80-kMT binding does not significantly change after  
8 mislocalizing Aurora B with 5-ITu (compare Figure 3D and 5E, and see Figure 5G). This suggests that  
9 Aurora B can still act on NDC80 even after the concentration of Aurora B at centromeres is greatly  
10 reduced. Consistent with this hypothesis, the Aurora B activity at kinetochores assessed by Nuf2-targeted  
11 Aurora B FRET sensor was not changed by 5-ITu treatment (Figure 5H). Furthermore, when cells treated  
12 with 5-ITu were exposed to the Aurora B inhibitor ZM447439, NDC80-kMT binding increased (to  
13 NDC80 FRET fraction of  $0.17 \pm 0.01$ , SEM) and Aurora B activity at kinetochores decreased (to Aurora  
14 B FRET sensor non-FRET fraction of  $0.55 \pm 0.01$ , SEM), indistinguishable from the levels in cells not  
15 subject to 5-ITu exposed to ZM447439 (Figure 5G and 5H). Thus, tension dependency of NDC80-kMT  
16 binding is conferred by Aurora B recruited to centromeres through a haspin-dependent pathway, while the  
17 average level of NDC80-kMT binding is also set by Aurora B, but in a manner that is not dependent on  
18 haspin.

## 19 20 **The concentration of Aurora B at the location of NDC80 is dependent on centromere tension**

21 The extent to which Aurora B phosphorylates NDC80 depends on the activity of Aurora B and the  
22 concentration of Aurora B at NDC80. To further investigate how the haspin-dependent pool of Aurora B  
23 confers tension dependency to NDC80-kMT binding, we next examined how Aurora B localization  
24 depends on K-K distance. We used spinning-disk confocal microscopy to image mNeonGreen-Nuf2, to  
25 locate NDC80, and INCENP-mCherry, to measure the distribution of Aurora B. We localized NDC80 to

1 sub-pixel accuracy and identified sister kinetochore pairs (see Figure 6A and Materials and Methods). For  
2 each pair of kinetochores, we measured the intensity of INCENP-mCherry at the location of NDC80,  
3 normalized on a cell-by-cell basis. Plotting the intensity of INCENP-mCherry at NDC80 as a function of  
4 K-K distance revealed a highly significant anti-correlation ( $p < 10^{-4}$ , Figure 6B). To explore a  
5 larger range of K-K distances, we treated cells with 10  $\mu$ M taxol. Combining the data of untreated and  
6 taxol-treated cells, we found that the intensity of INCENP-mCherry at NDC80 linearly decreases with K-  
7 K distance over the full range of K-K distance ( $p < 10^{-6}$ ). This observation suggests that the tension  
8 dependency of NDC80 binding may result from the decrease of Aurora B at NDC80 with increasing K-K  
9 distance.

10 We next investigated how the concentration of Aurora B at the location of NDC80 is influenced  
11 by haspin inhibition. In the presence of 10  $\mu$ M 5-ITu, the concentration of Aurora B at NDC80 was  
12 greatly reduced and independent of K-K distance (Figure 6B). The lack of correlation between Aurora B  
13 concentration at NDC80 and K-K distance may explain the lack of tension dependency between NDC80-  
14 kMT binding and K-K distance upon haspin inhibition. We speculate that the finite concentration of  
15 Aurora B at NDC80 after haspin inhibition is the pool of Aurora B that maintains the average level of  
16 NDC80-kMT binding as described above.

17

### 18 **A biophysical model of tension dependent NDC80-kMT binding**

19 Taking together, our data suggest that the concentration of Aurora B at NDC80 determines the extent of  
20 NDC80 phosphorylation, which in turn determines the level of NDC80-kMT binding. To further explore  
21 this possibility, we sought to determine the relationship between Aurora B concentration at NDC80 and  
22 NDC80-kMT binding. We plotted the NDC80-kMT binding (converted from the NDC80 FRET fraction  
23 in Figure 3D and 5E) vs. the Aurora B concentration (converted from the normalized INCENP-mCherry  
24 intensity in Figure 6D) for each K-K distance, both with and without haspin inhibition (Figure 7A, see  
25 Materials and Methods). This revealed a highly nonlinear relationship: when the Aurora B concentration

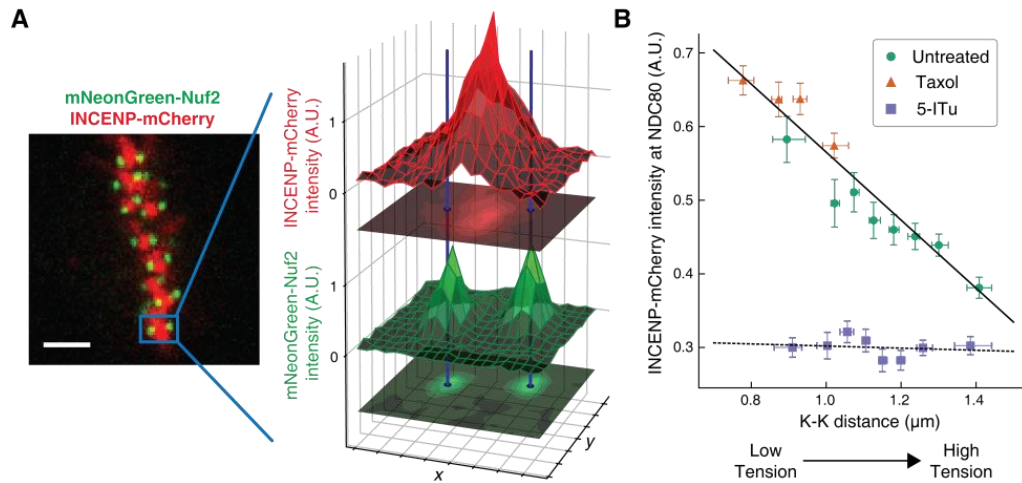

1  
2 **Figure 6. The concentration of Aurora B at the location of NDC80 decreases with centromere**  
3 **tension.**  
4 (A) Spinning-disk confocal microscopy image of mNeonGreen-Nuf2 (green) and INCENP-mCherry  
5 (red). 3 μm scale bar. The location of NDC80 was determined to sub-pixel accuracy, using the  
6 mNeonGreen-Nuf2 image. For each pair of sister kinetochores, the intensity of INCENP-mCherry at the  
7 location of NDC80 was measured and normalized on a cell-by-cell basis.  
8 (B) Normalized INCENP-mCherry intensity at the location of NDC80 were averaged within groups of  
9 kinetochores with similar K-K distances, and plotted against the K-K distances for untreated (green  
10 circles), taxol-treated (orange triangles), and 5-ITu-treated (purple squares) cells. Data points are the  
11 mean, y-error bars the SEM, and the x-error bars the interquartile ranges. Black solid and dotted lines are  
12 the linear fits to DMSO+taxol combined data and 5-ITu data, respectively.  
13 906 kinetochore pairs in 9 cells, 599 pairs in 8 cells, and 680 pairs in 6 cells were analyzed for DMSO  
14 control, taxol treatment, and 5-ITu treatment data, respectively.  
15 Data points and source FLIM data are available in Figure6-Data (Yoo et al.).

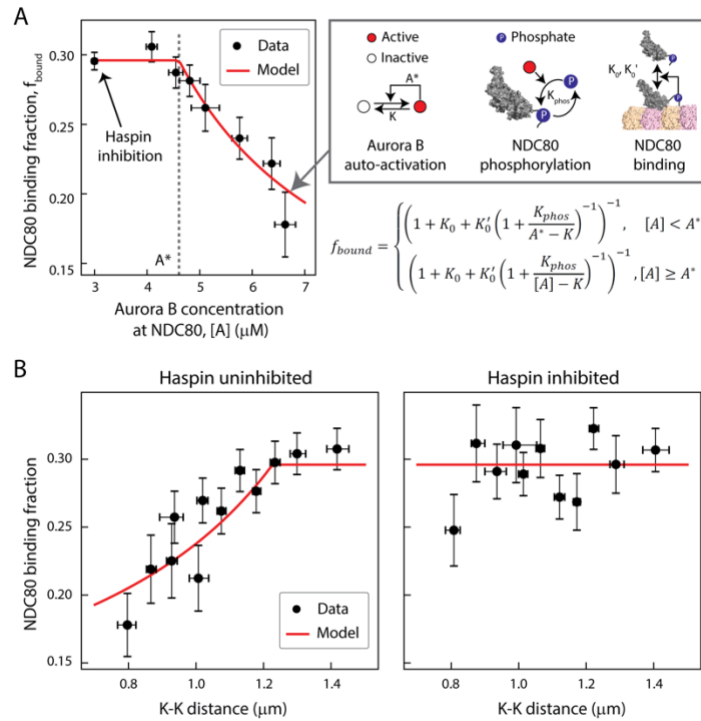

1  
 2 **Figure 7. A biophysical model of tension dependent NDC80-kMT binding**  
 3 (A) Plot of NDC80 binding fraction,  $f_{bound}$ , (converted from NDC80 FRET fraction in Figure 3D and 5E)  
 4 vs. Aurora B concentration at NDC80,  $[A]$  (converted from INCENP-mCherry intensity in Figure 6B, see  
 5 Materials and Methods). Data points (black circles) are the mean and SEM. We constructed a  
 6 mathematical model that predicts NDC80 binding fraction from Aurora B concentration at NDC80  
 7 through three steps: intermolecular Aurora B auto-activation, NDC80 phosphorylation, and NDC80-kMT  
 8 binding. Red line shows the mathematical model fit to the data.  
 9 (B) NDC80 binding fraction vs. K-K distance before (left) and after (right) haspin inhibition by 5-ITu.  
 10 The data points (black circles) are adapted from Figure 3D and 5E. Red lines are the predictions from the  
 11 mathematical model.  
 12 Data points are available in Figure7-Data (Yoo et al.).

1 is lower than  $\sim 5 \mu\text{M}$ , the NDC80 binding fraction is independent of the Aurora B concentration, while for  
2 higher concentrations, the NDC80 binding fraction decreases with the Aurora B concentration (Figure  
3 7A). We constructed a mathematical model to determine if this nonlinear relationship can be explained by  
4 the known biochemistry of Aurora B and NDC80 (Figure 7A) and observed change in the concentration  
5 of Aurora B at NDC80 (Figure 6B). In this model, we assume that there are two independent pools of  
6 Aurora B, haspin-dependent and haspin-independent, both of which engage in intermolecular  
7 autoactivation by phosphorylation in *trans* (Zaytsev et al., 2016, Xu et al., 2010, Sessa et al., 2005,  
8 Bishop and Schumacher, 2002), and are inactivated by phosphatases (Zaytsev et al., 2016, Sessa et al.,  
9 2005, Kelly et al., 2007, Rosasco-Nitcher et al., 2008). The activated Aurora B phosphorylates NDC80,  
10 which changes the binding affinity of NDC80 for kMTs (Cheeseman et al., 2006, Zaytsev et al., 2014,  
11 Zaytsev et al., 2015). This model can be solved analytically, and is sufficient to account for the  
12 relationship between NDC80 phosphorylation and NDC80-kMT binding (Figure 4F), and the relationship  
13 between Aurora B concentration at NDC80 and NDC80-kMT binding (Figure 7A). In this model, the  
14 nonlinear relationship between Aurora B concentration at NDC80 and NDC80-kMT binding ultimately  
15 results from the activation dynamics of Aurora B: at low concentrations, dephosphorylation by  
16 phosphatases overwhelm the in *trans* autoactivation, but above a threshold Aurora B concentration,  $A^*$ ,  
17 these two processes balance, leading to steady state level of activated Aurora B that further increases with  
18 increasing Aurora B concentration.

19 We next investigated if the same model can recapitulate the tension dependency of NDC80-kMT  
20 binding. Inputting the measured linear relationship between Aurora B concentration at NDC80 and K-K  
21 distance (Figure 6B) into the model reproduced the observed tension-dependent behavior of NDC80-kMT  
22 binding (Figure 7B, left). Performing a similar procedure with the data from haspin inhibited cells (Figure  
23 5E and 6B) revealed that the model successfully predicts both the level of NDC80-kMT binding upon  
24 haspin inhibition and its independence on K-K distance (Figure 7B, right). Thus, this model provides a  
25 self-consistent, quantitative explanation of how the tension dependency of NDC80-kMT binding results



1 from the biochemistry of Aurora B and NDC80, and the measured change in Aurora B concentration at  
2 NDC80 with tension, without the need to invoke diffusible gradients or additional mechanochemistry.

3

#### 4 **DISCUSSION**

5 In this study, we developed a method to quantitatively measure the binding of the NDC80 complex to  
6 microtubules at individual kinetochores in human tissue culture cells. Our method uses TCSPC FLIM-  
7 FRET which, in contrast to intensity-based FRET, allows quantitative measurements of the fraction of  
8 molecules engaging in FRET, even with spatially varying concentrations of donors and acceptors. We  
9 calibrated our measurements using control experiments and Monte Carlo simulations, allowing us to  
10 convert the fraction of donor-labeled Nuf2 engaged in FRET to the fraction of NDC80 complexes bound  
11 to kMTs. This technique can be extended to the quantitative assessment of other protein-protein  
12 interactions in living cells.

13         Using this technique, we demonstrated that NDC80-kMT binding is regulated during  
14 prometaphase in a chromosome-autonomous manner. We observed that NDC80-kMT binding is strongly  
15 correlated to centromere tension, to an extent which is sufficient to account for the changes in NDC80-  
16 kMT binding over the course of prometaphase and metaphase. We characterized how Aurora B modulates  
17 NDC80-kMT binding in cells, which we found predominantly occurs through the phosphorylation of the  
18 N-terminal tail of Hec1. We showed that the correlation between NDC80-kMT binding and centromere  
19 tension is dependent on the phosphorylation of the N-terminal tail of Hec1. We determined the  
20 concentration of Aurora B at the locations of NDC80, which decreases with increasing centromere  
21 tension. Mislocalizing Aurora B by inhibiting haspin kinase eliminated the tension dependency of  
22 NDC80-kMT binding, but did not change its average level. The observation that inhibiting haspin  
23 removes the correlations between NDC80-kMT binding and tension, and between Aurora B localization  
24 and tension, but does not affect the distribution of K-K distances, argues that these correlations are caused  
25 by the influence of tension on NDC80-kMT binding and Aurora B localization. A simple mathematical

1 model of Aurora B autoactivation, and NDC80 phosphorylation and binding can quantitatively explain  
2 these results. Taking together, this leads to a biophysical model of the tension dependency of NDC80-  
3 kMT interactions, which arises from the nonlinearity of Aurora B autoactivation and the change in Aurora  
4 B concentration at NDC80 with centromere tension.

5         The FLIM-FRET technique developed in this study measures the fraction of NDC80 complexes  
6 whose Hec1 CH domains are bound to kMTs. Hypothetically, changes in NDC80 binding fraction might  
7 result from either alterations in the binding affinity of NDC80 or variations in the number of kMTs. Our  
8 results argue that the increase in NDC80 binding with increasing tension is caused by changes in affinity,  
9 because: (1) the addition of taxol causes a reduction in tension and a reduction in NDC80 binding (Figure  
10 3D and 3E), but an increase in the number of kMTs (McEwen et al., 1997); (2) taxol-treated and STLC-  
11 treated cells exhibit the same correlation between tension and NDC80 binding (Figure 3D), suggesting  
12 that the decrease in binding with decreasing tension occurs independently of the mechanism of  
13 perturbation. Furthermore, previous estimates have found that each kMT can be contacted by  
14 approximately 40 NDC80 complexes (Zaytsev et al., 2014), and since there are approximately 240  
15 NDC80 complexes per kinetochore (Suzuki et al., 2015), roughly 6 kMTs are sufficient for every NDC80  
16 complex to be within reach of potential binding sites. Thus, NDC80 binding is expected to be insensitive  
17 to the number of kMTs if there are at least 6 kMTs. As on average there are ~20 kMTs per kinetochore in  
18 human cells (Maiato et al., 2004, Rieder, 1982), small changes in the number of kMTs are unlikely to  
19 modify the fraction of NDC80 complexes bound to kMTs. However, in circumstances where there are  
20 very few kMTs, for example in early prometaphase, changes in the number of kMTs will lead to changes  
21 in NDC80 binding. We hypothesize that the observed increase in NDC80 binding over the course of  
22 prometaphase to metaphase results from the combination of changes in kMT number and the changes in  
23 NDC80 binding affinity, due to the continual increase in tension at those times (Magidson et al., 2011).  
24 The difference in NDC80 binding between poleward-facing and anti-poleward-facing kinetochores in  
25 STLC-treated cells is likely caused by the difference in kMT numbers (Figure 3-figure supplement 2 and

1 Figure 5-figure supplement 1). This effect is particularly likely to explain the difference in NDC80  
2 binding between sister kinetochores with 9A-Hec1, since these sister kinetochores are expected to exhibit  
3 the same NDC80 binding affinity (Figure 5-figure supplement 1A).

4 Error correction is believed to result from the regulation of the detachment of kMTs from  
5 kinetochores (Godek et al., 2015). As NDC80 is the primary coupler of kinetochores to microtubules  
6 (Cheeseman et al., 2006, DeLuca et al., 2006), it is reasonable to hypothesize that the rate of kMT  
7 detachment from kinetochores might largely be governed by NDC80-kMT binding. Consistent with this,  
8 previous work showed that mutating NDC80 changes the number of kMTs in a manner that argues that  
9 increasing NDC80-kMT binding increases the stability of kMTs (Guimaraes et al., 2008, Zaytsev et al.,  
10 2014). Our work further supports the connection between NDC80-kMT binding and kMT stability by  
11 comparing our results with previous measurements of the rate of kMT detachment from kinetochores:  
12 NDC80-kMT binding increases during mitotic progression (Figure 2), while kMT stability increases  
13 (Zhai et al., 1995, Kabeche and Compton, 2013); NDC80-kMT binding increases in response to Aurora B  
14 inhibition (Figure 4), which causes an increase in kMT stability (Cimini et al., 2006); NDC80  
15 preferentially binds to polymerizing kMTs over depolymerizing kMTs (Figure 3C), while reconstituted  
16 kinetochores bind more strongly to polymerizing microtubules than depolymerizing microtubules  
17 (Akiyoshi et al., 2010); NDC80-kMT binding increases with increasing tension (Figure 3D), and the  
18 stability of kMTs increase with increasing tension (Nicklas and Koch, 1969, Akiyoshi et al., 2010). These  
19 comparisons argue that the NDC80-kMT binding is a major determinant of the kMT detachment rate.  
20 Hence, we propose that tension dependency of kMT detachment from kinetochores, which is believed to  
21 underlie error correction, results from the tension dependency of NDC80-kMT binding. If correct, this  
22 implies that error correction ultimately results from the nonlinear autoactivation of Aurora B and the  
23 consequent phosphoregulation of NDC80-kMT binding. Further testing this proposal will require  
24 additional quantitative measurements of kMT detachment, errors, and error correction, in combination  
25 with measurement of NDC80-kMT binding using the FLIM-FRET method presented here.

## 1 MATERIALS AND METHODS

| Key Resources Table                           |                                                                          |                     |                 |                                                                                                                                                                                                                                                             |
|-----------------------------------------------|--------------------------------------------------------------------------|---------------------|-----------------|-------------------------------------------------------------------------------------------------------------------------------------------------------------------------------------------------------------------------------------------------------------|
| Reagent type (species) or resource            | Designation                                                              | Source or reference | Identifiers     | Additional information                                                                                                                                                                                                                                      |
| cell line ( <i>Homo sapiens</i> )             | U2OS                                                                     | ATCC                | HTB-96          |                                                                                                                                                                                                                                                             |
| transfected construct ( <i>Homo sapiens</i> ) | pBABE-puro<br>mTurquoise2-Nuf2                                           | this paper          |                 | Nuf2 N-terminally labeled with mTurquoise2; in retroviral vector with puromycin selection marker                                                                                                                                                            |
| transfected construct ( <i>Homo sapiens</i> ) | pBABE-hygro<br>mTurquoise2-Nuf2                                          | this paper          |                 | Same as above, but with hygromycin selection marker                                                                                                                                                                                                         |
| transfected construct ( <i>Homo sapiens</i> ) | pBABE-blast<br>mTurquoise2-Nuf2                                          | this paper          |                 | Same as above, but with blasticidin marker                                                                                                                                                                                                                  |
| transfected construct ( <i>Homo sapiens</i> ) | pBABE-blast Aurora B FRET sensor (mTurquoise2/YPet)                      | this paper          |                 | modified from Addgene #45215; Fuller et al. (2008)                                                                                                                                                                                                          |
| transfected construct ( <i>Homo sapiens</i> ) | Nuf2-targeted Aurora B FRET sensor (mTurquoise2/Ypet)                    | this paper          |                 | modified from Addgene #45215; Fuller et al. (2008)                                                                                                                                                                                                          |
| transfected construct ( <i>Homo sapiens</i> ) | mTurquoise2-TC                                                           | this paper          |                 | mTurquoise2 with tetracycline motif at the C-terminus                                                                                                                                                                                                       |
| transfected construct ( <i>Homo sapiens</i> ) | WT-Hec1-LSSmOrange                                                       | this paper          |                 | modified from WT-Hec1-GFP from Jennifer DeLuca                                                                                                                                                                                                              |
| transfected construct ( <i>Homo sapiens</i> ) | 9A-Hec1-LSSmOrange                                                       | this paper          |                 | modified from 9A-Hec1-GFP from Jennifer DeLuca                                                                                                                                                                                                              |
| transfected construct ( <i>Homo sapiens</i> ) | 2D(S44,55D)-Hec1-LSSmOrange                                              | this paper          |                 | modified from 2D-Hec1-GFP from Jennifer DeLuca                                                                                                                                                                                                              |
| transfected construct ( <i>Homo sapiens</i> ) | 9D-Hec1-LSSmOrange                                                       | this paper          |                 | modified from 9D-Hec1-GFP from Jennifer DeLuca                                                                                                                                                                                                              |
| transfected construct ( <i>Homo sapiens</i> ) | INCENP-mCherry                                                           | other               |                 | Gift from Michael Lampson                                                                                                                                                                                                                                   |
| recombinant DNA reagent                       | pSpCas9(BB)-2A-GFP (pX458)                                               | Ran et al. (2013)   | Addgene: #48138 |                                                                                                                                                                                                                                                             |
| sequence-based reagent                        | Donor single-stranded DNA for TC tag insertion at the C-terminus of TUBB | IDT                 |                 | ssDNA:<br>cgtctctgagtatcagcagtagcaccagatgccaccgc<br>agaagaggaggaggatttcggtgaggaggccgaa<br>gaggaggcctGCTGTCCCGGCTGTTGct<br>aaggcagagccccatcacctcaggcttctcagttc<br>ccttagccgttactcaactgcccttctcctccctca<br>ga; sgRNA target sequence:<br>GAGGCCGAAGAGGAGGCCTA |

|                              |                                                              |                              |                    |                                                                                                         |
|------------------------------|--------------------------------------------------------------|------------------------------|--------------------|---------------------------------------------------------------------------------------------------------|
| sequence-based reagent       | Hec1 siRNA                                                   | Qiagen                       | Cat#: SI02653567   |                                                                                                         |
| peptide, recombinant protein | TC-peptide                                                   | Genscript                    | Custom designed    | Synthesized, Ac-AEEEACCPGCC-NH2                                                                         |
| commercial assay or kit      | Amaxa Cell Line Nucleofector Kit V                           | Lonza                        | Cat#:VCA-1003      |                                                                                                         |
| commercial assay or kit      | Ingenio Electroporation Kit                                  | Mirus                        | Cat#: MIR 50118    |                                                                                                         |
| commercial assay or kit      | Lipofectamine RNAiMax                                        | Thermo Fisher                | Cat#:13778075      |                                                                                                         |
| chemical compound, drug      | FIAsH-EDT2                                                   | Thermo Fisher                | Cat#:T34561        |                                                                                                         |
| chemical compound, drug      | 1,2-Ethanedithiol (EDT)                                      | Alfa Aesar                   | Cat#:540-63-6      |                                                                                                         |
| chemical compound, drug      | ZM447439                                                     | Enzo Life Sciences           | Cat#:BML-EI373     |                                                                                                         |
| chemical compound, drug      | Paclitaxel (Taxol)                                           | Enzo Life Sciences           | Cat#:BML-T104      |                                                                                                         |
| chemical compound, drug      | 5-iodotubercidin (5-ITu)                                     | Enzo Life Sciences           | Cat#:BML-EI29      |                                                                                                         |
| chemical compound, drug      | S-Trityl-L-cysteine                                          | Sigma Aldrich                | Cat#:164739-5G     |                                                                                                         |
| chemical compound, drug      | Alexa Fluor 488                                              | Thermo Fisher                | Cat#:A20000        |                                                                                                         |
| chemical compound, drug      | Sodium 2-mercaptoethanesulfonate                             | Sigma Aldrich                | Cat#:M1511         |                                                                                                         |
| software, algorithm          | Interactive kinetochore FLIM-FRET analysis GUI (MATLAB 2016) | This paper                   |                    | <a href="http://doi.org/10.5281/zenodo.1198705">http://doi.org/10.5281/zenodo.1198705</a>               |
| software, algorithm          | Aurora B concentration at NDC80 analysis (Python 3)          | This paper                   |                    | <a href="http://doi.org/10.5281/zenodo.1198702">http://doi.org/10.5281/zenodo.1198702</a>               |
| software, algorithm          | CAMPARI (v2)                                                 | Pappu Lab                    |                    | <a href="http://campari.sourceforge.net/V2/index.html">http://campari.sourceforge.net/V2/index.html</a> |
| software, algorithm          | Rosetta 3.8                                                  | RosettaCommons               |                    | RRID:SCR_015701                                                                                         |
| other                        | 25-mm #1.5 poly-D-lysine coated round coverglass             | neuVitro                     | Cat#:GG-25-1.5-pdl |                                                                                                         |
| other                        | FluoroBrite DMEM                                             | Thermo Fisher                | Cat#:A1896701      |                                                                                                         |
| other                        | Microtubule structure                                        | Zhang et al. (2015)          | PDB 3JAS           |                                                                                                         |
| other                        | Human NDC80 bonsai decorated tubulin dimer                   | Alushin et al. (2010)        | PDB 3IZ0           |                                                                                                         |
| other                        | mTurquoise structure                                         | Stetten et al. (unpublished) | PDB 4B5Y           |                                                                                                         |

1

## 2 Cell lines

3 U2OS cell lines (ATCC, HTB-96) were maintained in Dulbecco's modified Eagle's medium (DMEM,  
4 Thermo Fisher) supplemented with 10% Fetal Bovine Serum (FBS, Thermo Fisher), and 50 IU ml<sup>-1</sup>  
5 penicillin and 50 µg ml<sup>-1</sup> streptomycin (Thermo Fisher) at 37°C in a humidified atmosphere with 5% CO<sub>2</sub>.  
6 Cells were validated as mycoplasma free by PCR-based mycoplasma detection kit (Sigma Aldrich).

1

## 2 **Live-cell imaging**

3 All live-cell FLIM and spinning-disk confocal microscopy imaging were performed as follows. Cells  
4 were grown on a 25-mm diameter, #1.5-thickness, round coverglass coated with poly-D-lysine (GG-25-  
5 1.5-pdl, neuVibro) to 80~90% confluency. The cells were incubated in imaging media, which is  
6 FluoroBrite™ DMEM (Thermo Fisher) supplemented with 4 mM L-glutamine (Thermo Fisher) and 10  
7 mM HEPES, for 15~30 minutes before imaging. The coverglass was mounted on a custom-built  
8 temperature controlled microscope chamber at 37°C, while covered with 1 ml of imaging media and 2 ml  
9 of white mineral oil (VWR). An objective heater (Biotech) was used to maintain the objective at 37°C.  
10 We confirmed that the cells can normally divide longer than 6 hours in this condition. Only cells  
11 displaying proper chromosome alignment, normal spindle morphology, and high signal-to-noise ratio  
12 were selected for imaging and analysis.

13

## 14 **NDC80-kMT FLIM-FRET measurement**

### 15 mTurquoise2-NDC80/β-tubulin-TC-FIAsH stable U2OS cell line

16 A tetracysteine (TC) tag, CCPGCC, was genetically attached to the C-terminal end of tubulin beta class I  
17 (TUBB), an isotype of β-tubulin that is predominantly expressed in U2OS (assessed by qPCR, data not  
18 shown) and most other cancer cells (Leandro-Garcia et al., 2010). The attachment of the TC tag was  
19 achieved by CRISPR-induced homologous recombination to ensure the consistent expression of labeled  
20 β-tubulin. ssDNA (IDT) with TC tag (5'-TGCTGTCCCGGCTGTTGC-3') and ~80 bp-long homology  
21 arms was used as a donor DNA. pSpCas9(BB)-2A-GFP (Addgene plasmid # 48138) (Ran et al., 2013)  
22 was utilized as a backbone for the plasmid carrying a sgRNA (5'-GAGGCCGAAGAGGAGGCCUA-3')  
23 and Cas9. The plasmid and the donor ssDNA were simultaneously delivered into U2OS cells by  
24 electroporation (Nucleofector™ 2b and Amaxa Cell Line Nucleofector Kit V, Lonza). The insertion of the  
25 TC tag was verified through a PCR-based genotyping with primers 5'-

1 GCATGGACGAGATGGAGTTCAC-3' and 5'-CCAGCCGTGTTTCCCTAAATAAG-3', qPCR, and a  
2 fluorescence imaging after FAsH-EDT<sub>2</sub> staining.

3 The U2OS cells expressing TC-tagged  $\beta$ -tubulin were further engineered to stably express Nuf2  
4 N-terminally labeled with mTurquoise2 (Goedhart et al., 2012) by retroviral transfection, three times with  
5 different antibiotic selections, 1  $\mu\text{g ml}^{-1}$  puromycin, 2  $\mu\text{g ml}^{-1}$  blasticidin, and 200  $\mu\text{g ml}^{-1}$  hygromycin (all  
6 from Thermo Fisher). The retroviral vectors and their information are available on Addgene (plasmid #:  
7 80760, 80761, 80762). Monoclonal cell line was obtained by single cell sorting.

8  
9 FAsH-EDT<sub>2</sub> staining

10 The protocol for the association of FAsH-EDT<sub>2</sub> with  $\beta$ -tubulin-TC in cell was adapted from the previous  
11 study (Hoffmann et al., 2010) so as to maximize the labeling fraction while maintaining cell viability. The  
12 engineered U2OS cells expressing  $\beta$ -tubulin-TC were grown to 80~90% confluency in a 30-mm cell  
13 culture dish, and then were gently washed with Opti-MEM (Thermo Fisher) twice, and then stained in 2  
14 ml Opti-MEM with 1  $\mu\text{M}$  FAsH-EDT<sub>2</sub> (Thermo Fisher) for 2 hours. To reduce the non-specific binding  
15 of FAsH, the stained cells were subsequently incubated in Opti-MEM containing 250  $\mu\text{M}$  1,2-  
16 Ethanedithiol (EDT, Alfa Aesar) for 10 minutes, followed by a gentle wash with Opti-MEM. The cells  
17 were incubated in DMEM with 10% FBS for 6~10 hours before imaging, because they were found to be  
18 interphase-arrested for the first ~5 hours after the incubation with 250  $\mu\text{M}$  EDT. Every buffers and media  
19 above were pre-warmed at 37°C before use. All incubation steps were performed at 37°C in a humidified  
20 atmosphere with 5% CO<sub>2</sub>.

21  
22 FLIM measurement

23 Schematic instrumental setup of FLIM is shown in Figure 1—figure supplement 2A, and more details can  
24 be found in previous work (Yoo and Needleman, 2016). FLIM measurements were performed on a Nikon  
25 Eclipse Ti microscope using two-photon excitation from a Ti:Sapphire pulsed laser (Mai-Tai, Spectral-

1 Physics) with an 80-MHz repetition rate and ~70-fs pulse width, a galvanometer scanner (DCS-120,  
2 Becker & Hickl), TCSPC module (SPC-150, Becker & Hickl) and two hybrid detectors (HPM-100-40,  
3 Becker & Hickl). Objective piezo stage (P-725, Physik Instrumente) and motorized stage (ProScan II,  
4 Prior Scientific) were used to perform multi-dimensional acquisition, and a motor-driven shutter (Sutter  
5 Instrument) was used to block the excitation laser between acquisitions. The wavelength of the excitation  
6 laser was set to 865 nm. 470/24 and 525/30 bandpass emission filters (Chroma) were mounted on each  
7 detector, and a dichroic beam splitter (FF506-Di03, Semrock) was used for the simultaneous detection of  
8 mTurquoise2 and FIAsh fluorescence. The excitation laser was expanded to overfill the back-aperture of  
9 a water-immersion objective (CFI Apo 40× WI, NA 1.25, Nikon). The power of the excitation laser was  
10 adjusted to 1.1~1.5 mW at the objective. All the electronics were controlled by SPCM software (Becker  
11 & Hickl) and  $\mu$ Manager (Edelstein et al., 2014). Scanning area was set to either  $13.75 \mu\text{m} \times 13.75 \mu\text{m}$  or  
12  $27.5 \mu\text{m} \times 27.5 \mu\text{m}$ , and the pixel size was set to 107 nm. Each image was acquired for 3~5 seconds of  
13 integration time. Acquisition interval was set to 13 seconds for the FLIM-FRET data in Figure 3 and 5,  
14 and 60~90 seconds for the FLIM-FRET data in Figure 2 and 4. Three or four z-sections, separated by 1  
15  $\mu\text{m}$ , were acquired for each time point. No photo-bleaching or photo-damage was observed in this  
16 imaging condition. Mitotic phases were judged by the arrangement of kinetochores.

17

### 18 Kinetochores tracking and pairing

19 For the kinetochores FLIM-FRET measurements shown in Figure 2 to 5, custom-built MATLAB graphical  
20 user interface (GUI) (available at <http://doi.org/10.5281/zenodo.1198705>) was used to import Becker  
21 and Hickl FLIM data, track kinetochores, identify kinetochores pairs, extract the FLIM curve from each  
22 kinetochores, and estimate the FLIM parameters using a nonlinear least-squared fitting or Bayesian FLIM  
23 analysis, as described below and in previous work (Yoo and Needleman, 2016). The GUI also allows the  
24 users to scrutinize and manually correct the kinetochores trajectories and pairing. The kinetochores tracking  
25 algorithm was adapted from a particle tracking algorithm (Pelletier et al., 2009), and the pair



1 identification was performed by selecting pairs of kinetochores with distances and velocity correlations in  
2 predefined ranges. Drift correction was done by measuring correlation between two consecutive spindle  
3 images. The velocity  $v(t)$  of kinetochore (in Figure 3) was estimated from the position  $x(t)$  using the  
4 five-point method:

$$5 \quad v(t) \approx \frac{-x(t + 2\Delta t) + 8x(t + \Delta t) - 8x(t - \Delta t) + x(t - 2\Delta t)}{12\Delta t}$$

6 Leading and trailing kinetochores (in Figure 3) were determined based on the velocities and the relative  
7 positions of paired sister kinetochores. The metaphase plate (in Figure 2) was determined by finding an  
8 equidistant plane between the two spindle poles (that were manually located based on spindle images).  
9 Poleward-facing and anti-poleward-facing kinetochores (in Figure 3 and 5) in STLC-treated cells were  
10 determined based on the relative positions of paired sister kinetochores and the position of the spindle  
11 pole, which was approximated by the average of the positions of kinetochores in each time point.

12

### 13 Bayesian FLIM analysis

14 Fluorescence decay curves from individual kinetochores at each time point contain only a few hundreds  
15 of photons. In this low photon count regime, FLIM analysis with conventional least-squared nonlinear  
16 regressions results in significantly biased estimate for the parameters (Kaye et al., 2017, Rowley et al.,  
17 2016). Therefore, we used a Bayesian approach, which has been described and tested previously (Yoo and  
18 Needleman, 2016, Kaye et al., 2017), and is briefly explained below.

19 Let  $\theta$  be the set of parameters of the FLIM-FRET model, and  $y = \{y_i\}$  be the observed FLIM  
20 data, where  $y_i$  is the number of photons detected in the  $i$ -th time bin of the FLIM curve. Then the  
21 posterior distribution of  $\theta$  (assuming a uniform prior distribution) is

$$22 \quad p(\theta|y) \propto \prod_{i=1}^N P(t_{ar} \in [(i-1)\Delta t, i\Delta t]|\theta)^{y_i}$$

1 where  $t_{ar}$  is the photon arrival time, and  $N$  is the number of time bins. Since the size of the time bin ( $\Delta t$ ,  
 2  $\sim 50$  ps) is much smaller than the time scale of fluorescence decay ( $\sim$ ns), the probability that the arrival  
 3 time  $t_{ar}$  falls in the  $i$ -th time bin can be approximated by a Riemann sum:

$$4 \quad P(t_{ar} \in [(i-1)\Delta t, i\Delta t] | \theta) \cong \sum_{k=(i-1)K+1}^{k=iK} h_{\theta}(k\widetilde{\Delta t})\widetilde{\Delta t}$$

5 where  $h_{\theta}$  is the discretized FLIM model,  $\widetilde{\Delta t}$  is the size of time bin with which instrument response  
 6 function (IRF) is measured, and the ratio  $K = \frac{\Delta t}{\widetilde{\Delta t}}$  is the ADC ratio, which is set to 16 for our data.

7  $h_{\theta}(k\widetilde{\Delta t})$  can be written as the convolution between the IRF and an exponential decay model,  $g_{\theta}$ :

$$8 \quad h_{\theta}(k\widetilde{\Delta t}) = (IRF * (Ag_{\theta} + (1-A)))(k\widetilde{\Delta t})$$

$$9 \quad \cong \sum_l mIRF[l - b_{shift}] \left( Ag_{\theta}((k-l)\widetilde{\Delta t}) + (1-A) \right)$$

10 where  $mIRF$  is the IRF measured with the finest time bins of size  $\widetilde{\Delta t}$ , and  $b_{shift}$  is an integer parameter  
 11 that determines the approximate shift of measured IRF relative to the theoretical IRF.  $(1-A)$  indicates  
 12 the relative contribution of noise that is uniformly distributed over time. The exponential decay model  
 13  $g_{\theta}(t_d)$  is set to  $\exp\left(-\frac{t_d}{\tau}\right)$  for the single-exponential decay model or  $(1 - f_{FRET})e^{-\frac{t_d}{\tau_D}} + f_{FRET}e^{-\frac{t_d}{\tau_{FRET}}}$   
 14 for the two-exponential decay model, where  $0 \leq f_{FRET} \leq 1$  is the FRET fraction. The posterior  
 15 distribution was computed by Gibbs sampling if the number of free parameters is greater than 3, or by  
 16 grid sampling otherwise (for example, when both long and short lifetimes are fixed).

17

## 18 NDC80 FRET fraction measurement procedures

19 The instrument response function (IRF) was acquired by measuring second-harmonic generation from a  
 20 urea crystal. Negative control FLIM measurements on the engineered cells (mTurquoise2-NDC80/ $\beta$ -  
 21 tubulin-TC) not incubated with FIAsh were performed for every experiment and the fluorescence decay  
 22 curves extracted from kinetochores were analyzed with a single-exponential FLIM-FRET model to

1 determine the long non-FRET lifetime, which is usually 3.7 to 3.8 ns. The short FRET lifetime was  
2 estimated by performing a two-exponential Bayesian FLIM-FRET analysis on the aggregated FLIM data  
3 of kinetochores in each cell stained with FIAsh while fixing the non-FRET lifetime to the value pre-  
4 determined from the negative control. Then we performed a two-exponential Bayesian FLIM-FRET  
5 analysis, with both FRET and non-FRET lifetimes fixed to the predetermined values, on FLIM data from  
6 each kinetochore. Kinetochores were grouped by time (Figure 2 and 4), positions (Figure 2B-D),  
7 velocities (Figure 3C), and K-K distances (Figure 3D, 5A and 5E). The posterior distributions in a group  
8 of kinetochores were multiplied and then marginalized to obtain the mean and SEM of the FRET fraction.  
9 We previously confirmed that this way of combining posterior distribution gives an unbiased estimate of  
10 the mean FRET fraction (Kaye et al., 2017). NDC80 binding fraction was calculated by dividing NDC80  
11 FRET fraction by the conversion factor 0.42, which had been determined by the calibration shown in  
12 Figure 1—figure supplement 5C.

13

#### 14 **Aurora B kinase activity measurement**

15 An Aurora B FRET sensor was constructed by replacing CyPet in a previous construct (Addgene plasmid  
16 # 45215) (Fuller et al., 2008) with mTurquoise2. The FRET sensor contains a kinesin-13 family Aurora B  
17 substrate whose phosphorylation results in its binding to the forkhead-associated domain in the sensor,  
18 which constrains the sensor to be in an open conformation and obstructs intramolecular FRET between  
19 mTurquoise2 and YPet (Figure 4—figure supplement 1B). Hence, the non-FRET fraction of the Aurora B  
20 FRET sensor is proportional to the Aurora B activity. The cytoplasmic Aurora B FRET sensor was stably  
21 expressed in U2OS cells by retroviral transfection (plasmid available on Addgene, plasmid # 83286). The  
22 Nuf2-targeted Aurora B FRET sensor was transiently transfected by electroporation (Nucleofector 2b,  
23 Lonza; Ingenio Electroporation Kit, Mirus) a day before imaging. The non-FRET fraction of the Aurora B  
24 FRET sensor was measured by FLIM-FRET in the same way as NDC80 FRET measurements described  
25 above. The exponential decay models  $y_{\text{binding}}(t) = A \left( 1 - \exp \left( -\frac{I_{t \geq 0} t}{\tau} \right) \right) + c$  and  $y_{\text{Aurora}}(t) =$

1  $A \exp\left(-\frac{I_{t \geq 0} t}{\tau}\right) + c$  were fitted to the time courses of NDC80 FRET fraction and FRET sensor non-FRET  
 2 fraction after ZM447439, respectively (Figure 4A, 4D, 4E and Figure 4-figure supplement 1D), where  
 3  $I_{t \geq 0}$  is equal to 0 if  $t$  is less than zero, and 1 otherwise. The estimated parameter values are given in the  
 4 table below:

| Figure | Parameter    | mean  | 95% CI        |
|--------|--------------|-------|---------------|
| 4A     | A            | 0.088 | (0.069,0.106) |
|        | $\tau$ (min) | 3.26  | (1.31,5.21)   |
|        | c            | 0.089 | (0.080,0.099) |
| 4D     | A            | 0.024 | (0.011,0.038) |
|        | $\tau$ (min) | 0.50  | (-0.70,1.71)  |
|        | c            | 0.059 | (0.048,0.071) |
| 4E     | A            | 0.17  | (0.16,0.18)   |
|        | $\tau$ (min) | 1.95  | (1.46,2.45)   |
|        | c            | 0.37  | (0.36,0.38)   |
| 4-S1D  | A            | 0.076 | (0.061,0.090) |
|        | $\tau$ (min) | 1.12  | (0.23,2.00)   |
|        | c            | 0.56  | (0.55,0.57)   |

5 The fraction of Aurora B phosphorylation sites in NDC80,  $f_{phos}$  (x-axis of Figure 4F), was converted  
 6 from the non-FRET fraction of Aurora B FRET sensor,  $f_{sensor}$  (y-axis of Figure 4E), as follows. First, we  
 7 assumed that  $f_{sensor}$  increases linearly with  $f_{phos}$ . Our result (Figure 4C) and previous work (Zaytsev et  
 8 al., 2014) suggest that Ndc80 has about one phospho-residue out of nine phosphorylation sites in late  
 9 prometaphase, based on which we assumed that  $f_{phos}^{WT} = 1/9$  before Aurora B inhibition, and  $f_{phos}^{ZM} = 0$   
 10 after the full Aurora B inhibition. Since  $f_{sensor}$  were measured to be  $f_{sensor}^{WT} = 0.540 \pm 0.007$  (SEM)  
 11 before Aurora B inhibition and  $f_{sensor}^{ZM} = 0.368 \pm 0.012$  (SEM) after the full Aurora B inhibition (Figure  
 12 4E), we converted  $f_{sensor}$  to  $f_{phos}$  by:

$$13 \quad f_{phos} = \frac{f_{sensor} - f_{sensor}^{ZM}}{f_{sensor}^{WT} - f_{sensor}^{ZM}} (f_{phos}^{WT} - f_{phos}^{ZM}) + f_{phos}^{ZM} = 0.646(f_{sensor} - 0.368)$$

14 The  $f_{bound}$  vs  $f_{phos}$  data in Figure 4F was fit using a NDC80 binding model:

$$15 \quad f_{bound} = (1 + K_0 + K'_0 f_{phos})^{-1}$$

16 which is derived in Mathematical modeling section below.

17

## 1 **Phosphomimetic Hec1 mutant experiments**

2 We used three different non-phosphorylatable mutant Hec1 (gift from Jennifer DeLuca) in which all nine  
3 identified Aurora B target sites in the N-terminal tail are mutated to either Asp (phospho-mimicking  
4 mutation) or Ala (phospho-null mutation) (DeLuca et al., 2011, Zaytsev et al., 2015, Zaytsev et al., 2014):  
5 9A-Hec1 (all nine sites substituted with Ala), 2D-Hec1 (two sites, S44 and S55, substituted with Asp,  
6 while the other seven sites with Ala), and 9D-Hec1 (all nine sites substituted with Asp). WT-Hec1 and the  
7 mutant Hec1 are C-terminally labeled with LSSmOrange. LSSmOrange signal at kinetochores were  
8 assessed to ensure the expression of the substituting Hec1 in cells.

9 Cells were grown to 50% confluence on a 10-cm petri dish in DMEM supplemented with 10%  
10 FBS and Penicillin-Streptomycin (P/S) as described above. To knock down endogenous Hec1/Ndc80  
11 protein, we used a FlexiTube siRNA duplex targeted to the 5' UTR of the Hec1 gene ( 5'-  
12 TCCCTGGGTCGTGTCAGGAAA-3', QIAGEN Hs\_KNTC2\_7 SI02653567). We incubated 240 pmol  
13 of the siRNA in 1.2 mL Opti-MEM (ThermoFisher 51985091) for 5 minutes with periodic flicking. We  
14 simultaneously incubated 8  $\mu$ L of Lipofectamine RNAiMax (ThermoFisher 13778030) in 1.2 mL Opti-  
15 MEM for 5 minutes. We then combined the siRNA and Lipofectamine solutions and incubated at room  
16 temperature for 30 minutes with periodic flicking. Prior to adding the siRNA-lipid complex, we washed  
17 the cells once with PBS and then replaced the media with 8 mL Opti-MEM supplemented with 10% FBS.  
18 We then added the entire 2.4 mL siRNA mixture to the cells dropwise and incubated the cells at 37°C for  
19 30 hours. Following the incubation, we nucleofected 2  $\mu$ g of plasmid encoding WT-, 9A-, 2D-, or 9D-  
20 Hec1 along with an additional 30 pmol of Hec1 siRNA into 1 million cells using a Lonza Nucleofector  
21 2b. We spread these cells evenly over three 35mm dishes containing 25mm poly-D-lysine coated  
22 coverslips and 2 mL of Opti-MEM supplemented with 10% FBS and P/S. We incubated overnight at  
23 37°C for 18 hours before staining with TC-FIAsH and FLIM-FRET imaging as described above.

24

## 25 **Aurora B concentration at NDC80 measurement**

1 mNeonGreen-Nuf2/INCENP-mCherry U2OS cell

2 mNeonGreen fluorescent protein (Shaner et al., 2013) was genetically attached to the N-terminal end of  
3 Nuf2 by CRISPR-induced homologous recombination with an sgRNA (5' -  
4 GAAAGACAAAGTTTCCATCTTGG-3') and mNeonGreen sequence (Allele Biotechnology) flanked by  
5 2kb homology arms as a donor template. Monoclonal cell line was obtained by fluorescence-activated cell  
6 sorting and screened by fluorescent microscopy imaging. The mNeonGreen-Nuf2 U2OS cell line was  
7 transiently transfected with INCENP-mCherry (gift from Michael Lampson) by electroporation  
8 (Nucleofector 2b and Amaxa Cell Line Nucleofector Kit V, Lonza) a day before imaging, using the  
9 manufacturer's protocol.

10

11 Spinning-disk confocal microscopy imaging

12 Cells were imaged using a spinning-disk confocal microscope (Nikon Ti2000, Yokugawa CSU-X1) with  
13 1.5x magnification lens and 1.2x tube lens, an EM-CCD camera (Hamamatsu), a 60x water-immersion  
14 objective (Nikon), an objective piezo stage (P-725, Physik Instrumente), and motorized x-y stage  
15 (ProScan II, Prior Scientific) controlled by  $\mu$ Manager (Edelstein et al., 2014). A 488-nm laser and 514/30  
16 filter were used to image mNeonGreen-Nuf2, and a 560-nm laser and 593/40 filter were used to image  
17 INCENP-mCherry. 11-15 z-slices, separated by 2  $\mu$ m, were taken for each time point. Three time points,  
18 separated by a minute, were acquired before and after DMSO (for untreated data), 10  $\mu$ M taxol, or 10  $\mu$ M  
19 5-ITu treatment.

20

21 Aurora B concentration at NDC80 measurement

22 Image analysis was performed by a custom Python code (available at  
23 <http://doi.org/10.5281/zenodo.1198702>). Kinetochore identification was achieved by applying *trackpy*  
24 package ([github.com/soft-matter/trackpy](https://github.com/soft-matter/trackpy)) to mNeonGreen-Nuf2 fluorescence images. The sub-pixel  
25 location of NDC80 was calculated by centroid estimation. Sister kinetochore pairs were determined based

1 on the relative positions of kinetochores and the INCENP-mCherry intensity between kinetochores. For  
2 each identified kinetochore pair, INCENP-mCherry intensities at the NDC80 centroid locations,  $I_{NDC80}$ ,  
3 and INCENP-mCherry intensity at the midpoint between two sister kinetochores,  $I_{mid}$ , were measured by  
4 two-dimensional cubic interpolation with *scipy.interpolate.griddata* function. For each cell, we used  
5  $\overline{I_{mid}}$ , which is  $I_{mid}$  averaged over kinetochores in the images before chemical treatments, and  
6 cytoplasmic background level,  $I_{bg}$ , to obtain normalized the INCENP-mCherry intensities at NDC80,  
7  $I_{NDC80}^{norm}$ , by:

$$8 \quad I_{NDC80}^{norm} = \frac{I_{NDC80} - \overline{I_{mid}}}{\overline{I_{mid}} - I_{bg}}$$

9 Kinetochores with similar K-K distances were grouped in the same way as in Figure 3D and 5E, and then  
10 the normalized INCENP-mCherry intensities at NDC80,  $I_{NDC80}^{norm}$ , were averaged within each group. The  
11 normalized INCENP-mCherry intensity was converted to Aurora B concentration in Figure 7A by  
12 assuming that  $\overline{I_{mid}}$  corresponds to the peak Aurora B concentration, which was previously estimated to be  
13 10  $\mu\text{M}$  (Zaytsev et al., 2016).

14

## 15 **Drug treatments**

16 Cells were incubated with 5  $\mu\text{M}$  Nocodazole (Sigma Aldrich) for >10 minutes for microtubule  
17 depolymerization. Aurora B inhibition was performed by adding 3  $\mu\text{M}$  of ZM447439 (Enzo Life  
18 Sciences) during imaging. Taxol (Enzo Life Sciences) treatment was performed at 10  $\mu\text{M}$  final  
19 concentration for >10 minutes. S-Trityl-L-cysteine (STLC, Sigma Aldrich) treatment was performed at 5  
20  $\mu\text{M}$  final concentration for >60 minutes to induce monopolar spindles. For the haspin kinase inhibition,  
21 cells were treated with 10  $\mu\text{M}$  5-iodotubercidin (5-ITu, Enzo Life Sciences) for >10 minutes. The double  
22 treatment of 5-ITu and taxol or STLC was performed sequentially by treating cells with 10  $\mu\text{M}$  taxol or 5  
23  $\mu\text{M}$  STLC and then adding 10  $\mu\text{M}$  5-ITu.

24

## 1 **Mathematical modeling**

2 Here we describe the mathematical model presented in Figure 7 in detail. The model predicts NDC80  
3 binding fraction from Aurora B concentration at NDC80 in three steps: (1) Aurora B activation dynamics,  
4 consisting of autoactivation in *trans* and deactivation, which determines the concentration of *active*  
5 Aurora B from the concentration of Aurora B; (2) NDC80 phosphorylation, which is dependent on the  
6 active Aurora B concentration; and (3) NDC80-kMT binding, which is governed by the phosphorylation  
7 level of NDC80.

8

### 9 (1) Aurora B activation

10 In this section, we present a quantitative model for the relationship between the Aurora B concentration  
11 (which we measured in Figure 6) and the *active* Aurora B concentration (which determines the steady-  
12 state level of NDC80 phosphorylation). It has been previously argued that Aurora B activation is  
13 predominately due to active Aurora B phosphorylating inactive Aurora B in *trans* (Zaytsev et al., 2016,  
14 Xu et al., 2010, Sessa et al., 2005, Bishop and Schumacher, 2002), which we incorporate into our model.  
15 We model Aurora B at the location of NDC80 as consisting of two separate pools: one that is dependent  
16 on haspin, and the other that is not. We assume that those two Aurora B pools do not interact with each  
17 other, and independently undergo auto-activation in *trans*. We further assume that the phosphatases  
18 activity proceeds at a constant rate for each pool.

19 We denote the haspin-dependent and haspin-independent pools of Aurora B by  $A_{hd}$  and  $A_{hi}$ ,  
20 respectively. Then the inter-molecular autoactivation by in *trans* phosphorylation and inactivation by  
21 dephosphorylation for each of the two Aurora B pools are described by:

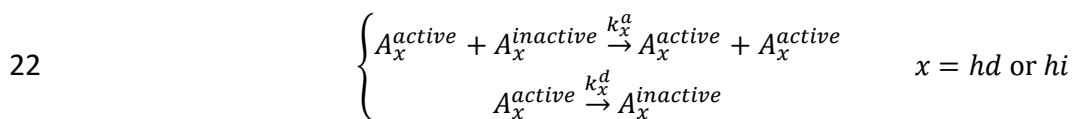



1 where  $A_x^{active}$  and  $A_x^{inactive}$  are the active and inactive Aurora B in pool  $x$ , respectively, and  $k_x^a$  and  $k_x^d$   
 2 are the rates of Aurora B activation and deactivation for the pool  $x$ , respectively. Thus, an ordinary  
 3 differential equation (ODE) for active Aurora B concentration can be written as:

$$\begin{aligned}
 4 \quad \frac{\partial [A_x^{active}]}{\partial t} &= k_x^a [A_x^{active}] [A_x^{inactive}] - k_x^d [A_x^{active}] \\
 5 &= k_x^a [A_x^{active}] ([A_x] - [A_x^{active}]) - k_x^d [A_x^{active}] \\
 6 &= k_x^a [A_x^{active}] \left( [A_x] - \frac{k_x^d}{k_x^a} - [A_x^{active}] \right)
 \end{aligned}$$

7 where  $[A_x] = [A_x^{active}] + [A_x^{inactive}]$  is the concentration of the pool  $x$ . The steady-state solution for this  
 8 ODE is:

$$9 \quad [A_x^{active}] = \begin{cases} 0, & [A] < K_x \\ [A_x] - K_x, & [A] \geq K_x \end{cases}$$

10 where  $K_x \equiv k_x^d/k_x^a$  is the equilibrium constant for the Aurora B activation for pool  $x$ . We can infer that  
 11  $[A_{hi}^{active}] = [A_{hi}] - K_{hi}$  is positive, because Aurora B still acts on NDC80 after the removal of the  
 12 haspin-dependent pool (Figure 5). Therefore, the total concentration of active Aurora B at NDC80 can be  
 13 written as:

$$\begin{aligned}
 [A^{active}] &= [A_{hd}^{active}] + [A_{hi}^{active}] \\
 &= \begin{cases} [A_{hi}] - K_{hi}, & [A] < K_{hd} + [A_{hi}] \\ [A] - K_{hd} - K_{hi}, & [A] \geq K_{hd} + [A_{hi}] \end{cases} \\
 &= \begin{cases} A^* - K, & [A] < A^* \\ [A] - K, & [A] \geq A^* \end{cases} \quad (\text{Eq. 1})
 \end{aligned}$$

14 where  $[A] = [A_{hd}] + [A_{hi}]$  is the total concentration of Aurora B at NDC80,  $K = K_{hd} + K_{hi}$ , and  $A^* =$   
 15  $K_{hd} + [A_{hi}]$  is a threshold Aurora B concentration, which is the minimum concentration of Aurora B  
 16 required for the activity of Aurora B to increase with its concentration.

17

18 (2) NDC80 phosphorylation

1 In this section, we present a mathematical model to relate the total concentration of active Aurora B at  
 2 NDC80,  $[A^{active}]$ , to the phosphorylation level of NDC80. Active Aurora B may phosphorylate multiple  
 3 Aurora B phosphorylation sites in each Ndc80 N-terminal tail (Guimaraes et al., 2008), which we  
 4 describe with the equations:

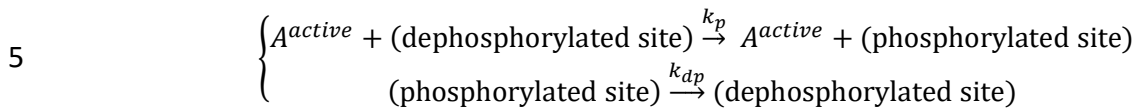

6 The corresponding ODE for the number of phosphorylated sites is:

$$9 \quad \frac{\partial N_p}{\partial t} = k_p [A^{active}] N_{dp} - k_{dp} N_p$$

$$10 \quad = k_p [A^{active}] (N - N_p) - k_{dp} N_p$$

7 where  $N_p$ ,  $N_{dp}$ , and  $N = N_p + N_{dp}$  is the number of phosphorylated sites, dephosphorylated sites, and the  
 8 total number of sites per kinetochore, respectively. The steady-state solution for the ODE gives:

$$f_{phos} = \frac{N_p}{N} = \left( 1 + \frac{K_{phos}}{[A^{active}]} \right)^{-1} \quad (\text{Eq. 2})$$

11 where  $f_{phos}$  is the fraction of phosphorylated sites, and  $K_{phos} \equiv \frac{k_{dp}}{k_p}$  is the equilibrium constant for  
 12 NDC80 phosphorylation. Plugging Eq. 1 into Eq. 2 yields:

$$f_{phos} = \begin{cases} \left( 1 + \frac{K_{phos}}{A^* - K} \right)^{-1}, & [A] < A^* \\ \left( 1 + \frac{K_{phos}}{[A] - K} \right)^{-1}, & [A] \geq A^* \end{cases} \quad (\text{Eq. 3})$$

13

14 (3) NDC80 binding

15 In this section, we present a model to relate the fraction of phosphorylated sites in NDC80 per  
 16 kinetochore,  $f_{phos}$ , to the fraction of NDC80 bound to kMTs (which we measure using FLIM-FRET).

17 Assuming that the number of available binding sites for NDC80 is constant, we may describe the NDC80  
 18 binding and unbinding by the following equations:

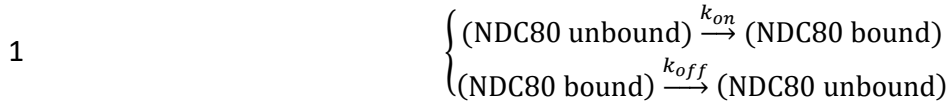

2 The corresponding ODE for the number of NDC80 bound to kMTs is:

3 
$$\frac{\partial n_{on}}{\partial t} = k_{on}n_{off} - k_{off}n_{on}$$

4 
$$= k_{on}(n - n_{on}) - k_{off}n_{on}$$

5 where  $n_{on}$  and  $n_{off}$  are the number of NDC80 bound and unbound to kMTs, respectively, and  $n =$

6  $n_{on} + n_{off}$  the total number of NDC80 per kinetochore. Solving for the steady state gives:

$$f_{bound} \equiv \frac{n_{on}}{n} = (1 + K_{binding})^{-1} \quad (\text{Eq. 4})$$

7 where  $K_{binding} = k_{off}/k_{on}$  is the equilibrium constant for the NDC80 binding, and  $f_{bound}$  is the NDC80  
8 binding fraction.

9

10 The binding affinity of NDC80 decreases with the phosphorylation level of NDC80 (Figure 4) (Zaytsev et

11 al., 2015), arguing that  $K_{binding}$  is a function of  $f_{phos}$ . Since  $f_{phos}$  is small in late prometaphase and

12 metaphase ( $< 1/9$ ), we approximate the function by a first-order polynomial, i.e.,  $K_{binding}(f_{phos}) \approx K_0 +$

13  $K'_0 f_{phos}$ , and consequently Eq. 4 becomes:

$$f_{bound} = (1 + K_0 + K'_0 f_{phos})^{-1} \quad (\text{Eq. 5})$$

14 Combining Eq. 3 and 5, we have the relationship between the total Aurora B concentration  $[A]$  and the

15 NDC80 binding fraction  $f_{bound}$  as:

$$f_{bound} = \begin{cases} \left(1 + K_0 + K'_0 \left(1 + \frac{K_{phos}}{A^* - K}\right)^{-1}\right)^{-1}, & [A] < A^* \\ \left(1 + K_0 + K'_0 \left(1 + \frac{K_{phos}}{[A] - K}\right)^{-1}\right)^{-1}, & [A] \geq A^* \end{cases} \quad (\text{Eq. 6})$$

16

1           We first determined the parameters  $K_0$  and  $K'_0$  by fitting Eq. 5 to the NDC80 binding fraction vs.  
2 phosphorylation level data in Figure 4F, which yielded  $K_0 = 1.43 \pm 0.06$  (SE) and  $K'_0 = 18 \pm 2$  (SE). To  
3 estimate the remaining three free parameters,  $K$ ,  $K_{phos}$ , and  $A^*$ , we fit Eq. 6 to the NDC80 binding  
4 fraction vs. Aurora B concentration at NDC80 data (Figure 7), and obtained  $K = 3.5 \pm 0.4$   $\mu\text{M}$  (SE),  
5  $K_{phos} = 19 \pm 5$   $\mu\text{M}$  (SE), and  $A^* = 4.6 \pm 0.2$   $\mu\text{M}$  (SE).

6

## 7 **Supplemental experiments**

### 8 Measurement of the fraction of $\beta$ -tubulin labeled with TC-FIAsH

9 To measure the fraction of  $\beta$ -tubulin labeled with TC-FIAsH, we sought to determine the concentration of  
10 labeled  $\beta$ -tubulin in the cell, and divide it by the total concentration of  $\beta$ -tubulin. We calculated the  
11 concentration of labeled  $\beta$ -tubulin by combining 3D fluorescence microscopy to measure the total  
12 fluorescence of  $\beta$ -tubulin-TC-FIAsH per cell, and fluorescence correlation spectroscopy (FCS) to measure  
13 the fluorescence per molecule of TC-FIAsH.

14

15 *3D fluorescence microscopy:* We acquired z-stacks of  $\beta$ -tubulin-TC-FIAsH in mitotic cells using two-  
16 photon fluorescence microscopy (Figure 1–figure supplement 1A), and then segmented the 3D images  
17 using an active contour approach (Figure 1–figure supplement 1B). Assuming that the cytoplasmic  
18 background results from FIAsH binding specifically to monomeric  $\beta$ -tubulin and nonspecifically to  
19 cysteine-rich proteins freely diffusing in the cytoplasm, the average number of photons emitted from  $\beta$ -  
20 tubulin-TC-FIAsH in microtubules is the difference between the average photon rate throughout the entire  
21 cell ( $423 \pm 33$   $\text{ms}^{-1}$ ) and the average photon rate in the cytoplasm (determined from the mode of  
22 fluorescence distribution within each segmented image,  $327 \pm 30$   $\text{ms}^{-1}$ ), which is  $96 \pm 12$   $\text{ms}^{-1}$  (Figure 1–  
23 figure supplement 1C). The instrumental setting of two-photon fluorescence microscopy was identical to  
24 that of the FLIM system described above, where the imaging parameters are: laser wavelength, 865 nm;

1 excitation intensity, 3 mW; integration time, 3 seconds; z-stack separation, 0.5  $\mu\text{m}$ ; scanning area, 27.5  
2  $\mu\text{m} \times 27.5 \mu\text{m}$ .

3  
4 *Fluorescence correlation spectroscopy*: To convert the measured photon rate from fluorescence  
5 microscopy to a measurement of the absolute concentration of  $\beta$ -tubulin-TC-FIAsH, we used two-photon  
6 FCS to determine the volume of the point spread function (PSF) and the molecular brightness (i.e. the  
7 number of photons emitted per molecule per second) of TC-FIAsH (Hess and Webb, 2002).

8 First, we performed an FCS measurement on 97-nM Alexa Fluor 488 (Thermo Fisher) in water.  
9 FCS measurements were performed on the same instrumental setting as the 3D fluorescence microscopy  
10 described above, with laser intensity 5 mW. 5 autocorrelation functions, each of which had been collected  
11 for 300 seconds, were averaged, and then the following FCS model,  $G_D(\tau)$ , was fitted to the average  
12 autocorrelation function:

$$13 \quad G_D(\tau) = \frac{1}{V_{eff} \chi^2 C} \left( \frac{1}{1 + 8D\tau/w_{xy}^2} \right) \left( \frac{1}{1 + 8D\tau/w_z^2} \right)^{\frac{1}{2}} + G_{\infty}$$

14 where  $V_{eff}$  is the effective volume of PSF,  $C$  the concentration of fluorophores (which is 97 nM),  $\chi^2$  the  
15 background noise correction factor (Hess and Webb, 2002),  $D$  the diffusion coefficient of Alexa Fluor 488,  
16 which was previously estimated to be 435  $\mu\text{m}^2/\text{s}$  (Petrasek and Schwille, 2008), and  $w_{xy}$  and  $w_z$  are the radial  
17 and axial beam waists, respectively (Figure 1–figure supplement 1D).  $w_z$  can be written in terms of  $V_{eff}$  and  
18  $w_{xy}$ :

$$19 \quad w_z = \left( \frac{2}{\pi} \right)^{3/2} \frac{V_{eff}}{w_{xy}^2}$$

20 Fitting the FCS model to the Alexa 488 FCS data estimated  $V_{eff}$  and  $w_{xy}$  to be  $0.364 \pm 0.004 \mu\text{m}^3$  and 278  
21  $\pm 4 \text{ nm}$ , respectively (Figure 1–figure supplement 1D).

22 We next performed an FCS measurement on a synthesized TC peptide labeled with FIAsH. 50  
23  $\mu\text{M}$  synthesized TC peptide (Ac-AEEEEACCPGCC-NH<sub>2</sub>, Genscript), 100  $\mu\text{M}$  FIAsH-EDT<sub>2</sub>, and 10 mM

1 2-mercaptoethanesulfonate (Sigma Aldrich) were incubated for an hour to associate TC peptide with  
2 FIAsh, then diluted in the imaging buffer by 500 times, and prepared on a coverslip for FCS  
3 measurement. The laser intensity was set to 3 mW. 6 autocorrelation functions, each of which had been  
4 collected for 300 seconds, were averaged, and the following FCS model was fitted to the average  
5 autocorrelation function to determine the number of fluorophores  $N$  in a focal volume  $V_{eff}$ :

$$6 \quad G_D(\tau) = \frac{1}{N\chi^2} \left( \frac{1}{1 + \tau/\tau_D} \right) \left( \frac{1}{1 + (w_{xy}^2/w_z^2)(\tau/\tau_D)} \right)^{\frac{1}{2}} + G_\infty$$

7 while  $w_{xy}$  and  $w_z$  were fixed to the values determined from the FCS measurement on Alexa Fluor 488  
8 (Figure 1–figure supplement 1E). The photon count collected during the FCS measurement was corrected  
9 for background noise, and then divided by  $N$  to yield the molecular brightness of TC-FIAsh,  $233.4 \pm 9.3$   
10  $s^{-1}$ . Using the estimated molecular brightness and the effective volume of the PSF, we calculated the  
11 average concentration of the polymerized  $\beta$ -tubulin-TC-FIAsh to be

$$12 \quad \frac{9.6 \times 10^4 s^{-1}}{(233.4 s^{-1})(0.364 \mu m^3)} = 1.13 \times 10^{21} m^{-3} = 1.88 \pm 0.13 \mu M$$

13  
14 *Calculating labeling ratio:* A previous study (Dumontet et al., 1996) estimated the percentage of  
15 polymerized  $\beta$ -tubulin in a mitotic human tissue culture cell to be  $36\% \pm 7\%$ . Combining this information  
16 with our estimate of an average concentration of polymerized  $\beta$ -tubulin-TC-FIAsh of  $1.88 \pm 0.13 \mu M$   
17 leads to a total concentration of  $\beta$ -tubulin-TC-FIAsh of  $1.88 \mu M \times 100/36 \approx 5.22 \pm 1.08 \mu M$ . Since the  
18 total concentration of tubulin dimer in a tissue culture cell is  $\sim 20 \mu M$  (Hiller and Weber, 1978), we  
19 estimated the fraction of labeled  $\beta$ -tubulin to be  $5.22 \mu M/20 \mu M \approx 26.1\% \pm 5.4\%$ . This estimate makes  
20 use of data obtained in different cell types, which may introduce inaccuracies. Systematic errors in the  
21 total concentration of tubulin or the concentration of the  $\beta$ -tubulin-TC-FIAsh will produce proportional  
22 errors in the estimates of the fraction of labeled  $\beta$ -tubulin, resulting in proportional systematic errors in  
23 the conversion of NDC80 FRET fraction to NDC80 binding fraction.

1

## 2 Förster radius estimation

3 To measure the Förster radius  $R_0$  of FRET between mTurquoise2 and TC-FIAsH, we created a construct  
4 containing mTurquoise2 tethered to TC (mTurquoise2-TC), expressed it in U2OS cells, and acquired  
5 fluorescence decays of mTurquoise2 using FLIM, which were well-described by a single-exponential  
6 fluorescence decay with a lifetime of  $3.75 \text{ ns} \pm 0.03 \text{ ns}$  (SD) in the absence of FIAsH labeling (Figure 1–  
7 figure supplement 4A). When FIAsH is added to these cells, FLIM measurements revealed the presence  
8 of additional shorter-lifetime species, corresponding to mTurquoise2 molecules engaged in FRET with  
9 TC-FIAsH (Figure 1–figure supplement 4A). Then we performed Monte Carlo protein simulations (which  
10 are described below) to model the conformational ensemble of the flexible tether between mTurquoise2  
11 and TC-FIAsH and obtain the distribution  $p(r)$  of the distance  $r$  between mTurquoise2 and FIAsH  
12 (Figure 1–figure supplement 4B). The fluorescence lifetime  $\tau$  of donors engaged in FRET is related to the  
13 donor-acceptor distance  $r$  by:

$$14 \quad \tau(r; R_0) = \frac{\tau_D}{1 + \left(\frac{R_0}{r}\right)^6}$$

15 where  $\tau_D$  is the fluorescence lifetime of the donor in non-FRET state ( $3.75 \text{ ns} \pm 0.03 \text{ ns}$ ), and  $R_0$  is the  
16 Förster radius. Therefore, the fluorescence decay  $y(t)$  of mTurquoise2-TC-FIAsH can be modeled as:

$$17 \quad y(t) = A_D \exp\left(-\frac{t}{\tau_D}\right) + A_{\text{FRET}} \int p(r) \exp\left(-\frac{t}{\tau(r; R_0)}\right) dr$$

18 where  $A_D$  is the population in the non-FRET state and  $A_{\text{FRET}}$  is that in the FRET state, both of which are  
19 free parameters of the model along with  $R_0$ . This model (after convolved with the IRF) was fit to the  
20 measured fluorescence decay curve of mTurquoise2-TC-FIAsH, allowing us to estimate the Förster radius  
21  $R_0$  to be  $5.90 \text{ nm} \pm 0.10 \text{ nm}$  (Figure 1–figure supplement 4C).

22

23 Characterization and calibration of NDC80-kMT FLIM-FRET measurements by Monte Carlo simulations

1 *Characterization of NDC80-kMT FRET vs NDC80-MT distance relationship:* To characterize the FRET  
2 between mTurquoise2-NDC80 and FAsH-labeled microtubule when NDC80 is not bound to the  
3 microtubule, we performed large-scale, atomistic Monte Carlo protein simulations to model the  
4 conformational ensemble of the tether between mTurquoise2 and NDC80 and the disordered C-terminal  
5 tails of twelve  $\beta$ -tubulins near the NDC80 complex (which is described below) (Figure 1–figure  
6 supplement 5A). 4000 sets of positions of mTurquoise2 and TC were generated for each case where the  
7 NDC80 bound to an inter- or intra-tubulin dimer interface was translated away from the microtubule by a  
8 certain distance (0~15 nm, 0.5 nm increment) in a direction perpendicular to the microtubule surface. For  
9 each randomly sampled set of distances between mTurquoise2 and TC-FAsH,  $\vec{r} = \{r_i\}$ , the fluorescence  
10 lifetime was calculated by:

$$11 \quad \tau(\vec{r}) = \frac{\tau_D}{1 + \sum_{i=1}^{12} I_i \left(\frac{R_0}{r_i}\right)^6}$$

12 where  $I_i \sim \text{Bernoulli}(f_{label})$  indicates whether or not the  $i$ -th TC motif is labeled with FAsH-EDT<sub>2</sub>;  $R_0$  is  
13 the Förster radius between mTurquoise2 and TC-FAsH; and  $\tau_D=3.75$  ns is the non-FRET lifetime of  
14 mTurquoise2 (Figure 1–figure supplement 5A). The estimated labeling fraction 26.1% and the Förster  
15 radius 5.90 nm were used for  $f_{label}$  and  $R_0$ , respectively. For each NDC80-kMT distance, 2 million  
16 fluorescence lifetimes were sampled, based on which we simulated 30 fluorescence decay curves of  
17 mTurquoise2 by:

$$18 \quad \text{Poisson} \left( A \int p(\vec{r}) \exp\left(-\frac{t}{\tau(\vec{r})}\right) d\vec{r} \right)$$

19 where the amplitude  $A$  of the fluorescence decay was set to 5000 (Figure 1–figure supplement 5A).  
20 Single- and double-exponential decay models were fit to the simulated fluorescence decays (by maximum  
21 likelihood method) (Figure 1–figure supplement 5B, bottom). The Bayesian information criterion (BIC)  
22 was used as a criterion for model selection between the single- and double-exponential decay models. The  
23 difference in BIC between single- and double-exponential models,  $\Delta\text{BIC} = \text{BIC}_{1\text{expo}} - \text{BIC}_{2\text{expo}}$ , was



1 plotted against the NDC80-kMT distance (Figure 1–figure supplement 5B, top right).  $\Delta\text{BIC}$  is negative  
2 when NDC80-kMT distance is larger than 8 nm, indicating that single-exponential model performs better  
3 than double-exponential model in terms of the goodness of fit and the complexity of model (Figure 1–  
4 figure supplement 5B).

5  
6 *NDC80-kMT FRET fraction calibration:* To obtain the relationship between NDC80 FRET fraction and  
7 NDC80 binding fraction, we performed large-scale Monte Carlo simulations to obtain 4000 sets of  
8 distances between mTurquoise2 and TC-FIAsH,  $\vec{r} = \{r_i\}$ , for each case where mTurquoise2-NDC80 is  
9 bound to the TC-tagged microtubule at the inter- or intra-dimer interface. Then we sampled 0.5 million  
10 fluorescence lifetimes  $\tau$  as described above, and simulated a fluorescence decay curve for the situation  
11 where a fraction  $f_b$  of mTurquoise2-NDC80 are bound to microtubules and have lifetime  $\tau(\vec{r})$ , while the  
12 other  $1 - f_b$  are not bound and have lifetime  $\tau_D$  (Figure 1–figure supplement 5C, green dots):

$$13 \quad \text{Poisson} \left( A \left[ (1 - f_b) \exp \left( -\frac{t}{\tau_D} \right) + f_b \int p(\vec{r}) \exp \left( -\frac{t}{\tau(\vec{r})} \right) d\vec{r} \right] \right)$$

14 where the amplitude  $A$  of the fluorescence decay curve was set to 10,000 (Figure 1–figure supplement 5C,  
15 left). The simulated fluorescence decay curve was then fit by two-exponential fluorescence decay model  
16 (Figure 1–figure supplement 5C, red lines):

$$17 \quad A' \left[ (1 - f_{FRET}) \exp \left( -\frac{t}{\tau_D} \right) + f_{FRET} \exp \left( -\frac{t}{\tau_{FRET}} \right) \right]$$

18 to acquire the FRET fraction,  $f_{FRET}$ . The data of NDC80 FRET fraction,  $f_{FRET}$ , vs NDC80 binding  
19 fraction,  $f_b$ , was fit using a linear model  $f_{FRET} = a f_b$  (Figure 1–figure supplement 5C, right). To  
20 determine the uncertainty in the slope  $a$  (gray area in Figure 1–figure supplement 5C, right), we repeated  
21 the process above with the mean  $\pm$  error values of  $R_0$  and beta-tubulin labeling fraction  $f_{label}$ . As a result,  
22 we obtained  $a = 0.42 \pm 0.08$ , and used this calibration to convert NDC80 FRET fraction to NDC80  
23 binding fraction.

24

1 Monte Carlo protein simulations

2 Atomistic simulations were performed by the CAMPARI (v2) package (Vitalis and Pappu, 2009b),  
3 employing the ABSINTH implicit solvation model and forcefield paradigm (Vitalis and Pappu, 2009a) at  
4 the intrinsic solvation (IS) limit (Das and Pappu, 2013) (unless stated otherwise), where the energy  
5 function is simply a combination of Lennard-Jones energy and ABSINTH solvation energy.

6  
7 *mTurquoise2-TC construct simulation:* For the Förster radius estimation, we ran 50 independent  
8 simulations on the mTurquoise2-TC construct in spherical soft-wall boundary conditions with radius 100  
9 Å. An input structure was used only for the folded mTurquoise2 domain (adapted from PDB 4B5Y), and  
10 we employed CAMPARI to generate the tether and TC domains (GMDELYKYSDLFLNCCPGCCMEP)  
11 from scratch. To prevent unphysical unfolding and/or conformational change of mTurquoise2, we  
12 imposed constraints on internal degrees of freedom of residues in the folded region. Each simulation  
13 consisted of  $2 \times 10^6$  MC steps with sampling frequency of  $(5,000 \text{ steps})^{-1}$ , and the simulation temperature  
14 was set to 400 K in order to scan a large structural ensemble. Note that the system is quickly relaxed in  
15 the intrinsic solvation (IS) limit, and hence it does not require a long simulation time to reach  
16 equilibration. The average coordinate of the alpha carbons of 4 residues before and after Trp66 was used  
17 as the location of mTurquoise2 chromophore, and the average coordinate of alpha carbons of the four  
18 cysteine residues in the TC motif was used as the location of TC-FIAsH.

19  
20 *mTurquoise2-NDC80 and TC-labeled microtubule simulation:* We constructed a system consisting of the  
21 NDC80 complex, 12 tubulin dimers as described in Figure 1–figure supplement 5A. The initial structures  
22 of the system were constructed by combining the structures of microtubule (PDB 3JAS) (Zhang et al.,  
23 2015) and one of bonsai-NDC80s attached to a tubulin dimer at the inter- and intra-dimer interfaces (PDB  
24 3IZ0) (Alushin et al., 2010), and then incorporating the structures of disordered regions (tether, GMDEL  
25 YKYSD LMET, and C-terminal tail+TC, SEYQQ YQDAT AEEEE DFGEE AEEEA CCPGC C)

1 generated by the loop modeling module of Rosetta 3.8 (Mandell et al., 2009, Leaver-Fay et al., 2011).  
2 Clashes in the initial structure were removed by the Rosetta relaxation module (Nivón et al., 2013). For  
3 folded regions (where we have structure information from PDB), we imposed constraints on internal  
4 degrees of freedom as before. To prevent dissociation of microtubule into individual tubulins, we also  
5 imposed a harmonic restraint potential on atoms at the interface of two different chains. If two atoms from  
6 different chains are closer than 20 Å, the pair contributes an additional potential

$$7 \quad E_{\text{drest}}(i, j) = k(r_{ij} - r_{ij}^0)^2,$$

8 where  $i$  and  $j$  are atomic indices,  $r_{ij}$  is the distance between two atoms  $i$  and  $j$ ,  $r_{ij}^0$  is the initial distance  
9 between  $i$  and  $j$ , and  $k$  is a force constant (set to 3.0 kcal/mol/Å<sup>2</sup>). We employed spherical soft-wall  
10 boundary conditions with radius 200 Å, and the simulation temperature of 400 K. We ran a relaxation  
11 simulation for  $2 \times 10^6$  MC steps, and a production simulation for another  $2 \times 10^6$  MC steps with sampling  
12 frequency of (500 steps)<sup>-1</sup>. For the FRET efficiency vs NDC80-MT data (Figure 1—figure supplement  
13 5B), we used the final structure of the relaxation simulation and translated the NDC80 complex along the  
14 axis orthogonal to the microtubule surface by several distance values: from 0 to 15 nm by increment of  
15 0.5 nm. For each system, a simulation of  $2 \times 10^6$  MC steps was conducted to generate data with sampling  
16 frequency of (500 steps)<sup>-1</sup>.

17

## 18 **Protein structure illustration**

19 Protein structure illustrations were generated by The PyMOL Molecular Graphics System, Version 2.0  
20 Schrödinger, LLC.

21

## 22 **Quantification and Statistical Analysis**

23 The statistical test used, sample size (number of cells and kinetochores), dispersion and precision  
24 measures can be found in figure legends, Results, or below. All curve fittings, except FLIM data analysis  
25 (which is separately explained above), were performed by Levenberg-Marquardt algorithm with residuals

- 1 weighted by the inverse of y-errors, and the corresponding 95% confidence intervals were calculated by
- 2 *predint* function in MATLAB. To assess the significance of correlation, we determined p-value from  $1 -$
- 3  $\alpha$ , where  $\alpha$  is the smallest confidence level that makes zero contained in the confidence interval of the
- 4 slope of the linear fit.

## ACKNOWLEDGMENTS

We thank A. Murray and N. Kleckner for comments on the manuscript; J. DeLuca, M. Lampson, and I. Cheeseman for reagents; F. Rago for help with retroviral transfection; D. Kim for help with nucleofection; Needleman lab members and J. Oh for proof reading, comments and discussion.

## COMPETING INTERESTS

The authors declare no competing financial interests.

## REFERENCES

- AKIYOSHI, B., SARANGAPANI, K. K., POWERS, A. F., NELSON, C. R., REICHOW, S. L., ARELLANO-SANTOYO, H., GONEN, T., RANISH, J. A., ASBURY, C. L. & BIGGINS, S. 2010. Tension directly stabilizes reconstituted kinetochore-microtubule attachments. *Nature*, 468, 576-9.
- ALUSHIN, G. M., RAMEY, V. H., PASQUALATO, S., BALL, D. A., GRIGORIEFF, N., MUSACCHIO, A. & NOGALES, E. 2010. The Ndc80 kinetochore complex forms oligomeric arrays along microtubules. *Nature*, 467, 805-10.
- ANDRESEN, M., SCHMITZ-SALUE, R. & JAKOBS, S. 2004. Short tetracysteine tags to beta-tubulin demonstrate the significance of small labels for live cell imaging. *Mol Biol Cell*, 15, 5616-22.
- ARMOND, J. W., VLADIMIROU, E., ERENT, M., MCAINSH, A. D. & BURROUGHS, N. J. 2015. Probing microtubule polymerisation state at single kinetochores during metaphase chromosome motion. *J Cell Sci*, 128, 1991-2001.
- BEREZIN, M. Y. & ACHILEFU, S. 2010. Fluorescence lifetime measurements and biological imaging. *Chem Rev*, 110, 2641-84.
- BIGGINS, S., SEVERIN, F. F., BHALLA, N., SASSOON, I., HYMAN, A. A. & MURRAY, A. W. 1999. The conserved protein kinase Ipl1 regulates microtubule binding to kinetochores in budding yeast. *Genes Dev*, 13, 532-44.
- BISHOP, J. D. & SCHUMACHER, J. M. 2002. Phosphorylation of the carboxyl terminus of inner centromere protein (INCENP) by the Aurora B Kinase stimulates Aurora B kinase activity. *J Biol Chem*, 277, 27577-80.
- CAMPBELL, C. S. & DESAI, A. 2013. Tension sensing by Aurora B kinase is independent of survivin-based centromere localization. *Nature*, 497, 118-21.

- CARMENA, M., WHEELOCK, M., FUNABIKI, H. & EARNSHAW, W. C. 2012. The chromosomal passenger complex (CPC): from easy rider to the godfather of mitosis. *Nat Rev Mol Cell Biol*, 13, 789-803.
- CHEESEMAN, I. M., CHAPPIE, J. S., WILSON-KUBALEK, E. M. & DESAI, A. 2006. The conserved KMN network constitutes the core microtubule-binding site of the kinetochore. *Cell*, 127, 983-97.
- CHEESEMAN, I. M. & DESAI, A. 2008. Molecular architecture of the kinetochore-microtubule interface. *Nat Rev Mol Cell Biol*, 9, 33-46.
- CIFERRI, C., PASQUALATO, S., SCREPANTI, E., VARETTI, G., SANTAGUIDA, S., DOS REIS, G., MAIOLICA, A., POLKA, J., DE LUCA, J. G., DE WULF, P., SALEK, M., RAPPILBER, J., MOORES, C. A., SALMON, E. D. & MUSACCHIO, A. 2008. Implications for kinetochore-microtubule attachment from the structure of an engineered Ndc80 complex. *Cell*, 133, 427-39.
- CIMINI, D., WAN, X., HIREL, C. B. & SALMON, E. D. 2006. Aurora kinase promotes turnover of kinetochore microtubules to reduce chromosome segregation errors. *Curr Biol*, 16, 1711-8.
- DAS, R. K. & PAPPU, R. V. 2013. Conformations of intrinsically disordered proteins are influenced by linear sequence distributions of oppositely charged residues. *Proceedings of the National Academy of Sciences*, 110, 13392-13397.
- DELUCA, J. G., GALL, W. E., CIFERRI, C., CIMINI, D., MUSACCHIO, A. & SALMON, E. D. 2006. Kinetochore microtubule dynamics and attachment stability are regulated by Hec1. *Cell*, 127, 969-82.
- DELUCA, K. F., LENS, S. M. & DELUCA, J. G. 2011. Temporal changes in Hec1 phosphorylation control kinetochore-microtubule attachment stability during mitosis. *J Cell Sci*, 124, 622-34.
- DELUCA, K. F., MEPELINK, A., BROAD, A. J., MICK, J. E., PEERSEN, O. B., PEKTAS, S., LENS, S. M. A. & DELUCA, J. G. 2018. Aurora A kinase phosphorylates Hec1 to regulate metaphase kinetochore-microtubule dynamics. *J Cell Biol*, 217, 163-177.
- DUMONT, S., SALMON, E. D. & MITCHISON, T. J. 2012. Deformations within moving kinetochores reveal different sites of active and passive force generation. *Science*, 337, 355-8.
- DUMONTET, C., DURAN, G. E., STEGER, K. A., MURPHY, G. L., SUSSMAN, H. H. & SIKIC, B. I. 1996. Differential expression of tubulin isoforms during the cell cycle. *Cell Motil Cytoskeleton*, 35, 49-58.
- EDELSTEIN, A. D., TSUCHIDA, M. A., AMODAJ, N., PINKARD, H., VALE, R. D. & STURMAN, N. 2014. Advanced methods of microscope control using muManager software. *J Biol Methods*, 1.
- FULLER, B. G., LAMPSON, M. A., FOLEY, E. A., ROSASCO-NITCHER, S., LE, K. V., TOBELMANN, P., BRAUTIGAN, D. L., STUKENBERG, P. T. & KAPOOR, T. M. 2008. Midzone activation of aurora B in anaphase produces an intracellular phosphorylation gradient. *Nature*, 453, 1132-6.

- GODEK, K. M., KABECHE, L. & COMPTON, D. A. 2015. Regulation of kinetochore-microtubule attachments through homeostatic control during mitosis. *Nat Rev Mol Cell Biol*, 16, 57-64.
- GOEDHART, J., VON STETTEN, D., NOIRCLERC-SAVOYE, M., LELIMOUSIN, M., JOOSEN, L., HINK, M. A., VAN WEEREN, L., GADELLA, T. W., JR. & ROYANT, A. 2012. Structure-guided evolution of cyan fluorescent proteins towards a quantum yield of 93%. *Nat Commun*, 3, 751.
- GUIMARAES, G. J., DONG, Y., MCEWEN, B. F. & DELUCA, J. G. 2008. Kinetochore-microtubule attachment relies on the disordered N-terminal tail domain of Hec1. *Curr Biol*, 18, 1778-84.
- HAASE, J., BONNER, M. K., HALAS, H. & KELLY, A. E. 2017. Distinct Roles of the Chromosomal Passenger Complex in the Detection of and Response to Errors in Kinetochore-Microtubule Attachment. *Dev Cell*, 42, 640-654 e5.
- HAUF, S., COLE, R. W., LATERRA, S., ZIMMER, C., SCHNAPP, G., WALTER, R., HECKEL, A., VAN MEEL, J., RIEDER, C. L. & PETERS, J. M. 2003. The small molecule Hesperadin reveals a role for Aurora B in correcting kinetochore-microtubule attachment and in maintaining the spindle assembly checkpoint. *J Cell Biol*, 161, 281-94.
- HESS, S. T. & WEBB, W. W. 2002. Focal volume optics and experimental artifacts in confocal fluorescence correlation spectroscopy. *Biophys J*, 83, 2300-17.
- HILLER, G. & WEBER, K. 1978. Radioimmunoassay for tubulin: a quantitative comparison of the tubulin content of different established tissue culture cells and tissues. *Cell*, 14, 795-804.
- HOFFMANN, C., GAIETTA, G., BUNEMANN, M., ADAMS, S. R., OBERDORFF-MAASS, S., BEHR, B., VILARDAGA, J. P., TSIEN, R. Y., ELLISMAN, M. H. & LOHSE, M. J. 2005. A FAsH-based FRET approach to determine G protein-coupled receptor activation in living cells. *Nat Methods*, 2, 171-6.
- HOFFMANN, C., GAIETTA, G., ZURN, A., ADAMS, S. R., TERRILLON, S., ELLISMAN, M. H., TSIEN, R. Y. & LOHSE, M. J. 2010. Fluorescent labeling of tetracysteine-tagged proteins in intact cells. *Nat Protoc*, 5, 1666-77.
- HUANG, H. B., HORIUCHI, A., GOLDBERG, J., GREENGARD, P. & NAIRN, A. C. 1997. Site-directed mutagenesis of amino acid residues of protein phosphatase 1 involved in catalysis and inhibitor binding. *Proc Natl Acad Sci U S A*, 94, 3530-5.
- KABECHE, L. & COMPTON, D. A. 2013. Cyclin A regulates kinetochore microtubules to promote faithful chromosome segregation. *Nature*, 502, 110-3.
- KAYE, B., FOSTER, P. J., YOO, T. Y. & NEEDLEMAN, D. J. 2017. Developing and Testing a Bayesian Analysis of Fluorescence Lifetime Measurements. *PLoS One*, 12, e0169337.
- KELLY, A. E., SAMPATH, S. C., MANIAR, T. A., WOO, E. M., CHAIT, B. T. & FUNABIKI, H. 2007. Chromosomal enrichment and activation of the aurora B pathway are coupled to spatially regulate spindle assembly. *Dev Cell*, 12, 31-43.

- KRENN, V. & MUSACCHIO, A. 2015. The Aurora B Kinase in Chromosome Bi-Orientation and Spindle Checkpoint Signaling. *Front Oncol*, 5, 225.
- LAMPSON, M. A. & CHEESEMAN, I. M. 2011. Sensing centromere tension: Aurora B and the regulation of kinetochore function. *Trends Cell Biol*, 21, 133-40.
- LEANDRO-GARCIA, L. J., LESKELA, S., LANDA, I., MONTERO-CONDE, C., LOPEZ-JIMENEZ, E., LETON, R., CASCON, A., ROBLEDO, M. & RODRIGUEZ-ANTONA, C. 2010. Tumoral and tissue-specific expression of the major human beta-tubulin isoforms. *Cytoskeleton (Hoboken)*, 67, 214-23.
- LEAVER-FAY, A., TYKA, M., LEWIS, S. M., LANGE, O. F., THOMPSON, J., JACAK, R., KAUFMAN, K. W., RENFREW, P. D., SMITH, C. A., SHEFFLER, W., DAVIS, I. W., COOPER, S., TREUILLE, A., MANDELL, D. J., RICHTER, F., BAN, Y.-E. A., FLEISHMAN, S. J., CORN, J. E., KIM, D. E., LYSKOV, S., BERRONDO, M., MENTZER, S., POPOVIĆ, Z., HAVRANEK, J. J., KARANICOLAS, J., DAS, R., MEILER, J., KORTEMME, T., GRAY, J. J., KUHLMAN, B., BAKER, D. & BRADLEY, P. 2011. Chapter nineteen - Rosetta3: An Object-Oriented Software Suite for the Simulation and Design of Macromolecules. *In*: JOHNSON, M. L. & BRAND, L. (eds.) *Methods in Enzymology*. Academic Press.
- LIU, D., VADER, G., VROMANS, M. J., LAMPSON, M. A. & LENS, S. M. 2009. Sensing chromosome bi-orientation by spatial separation of aurora B kinase from kinetochore substrates. *Science*, 323, 1350-3.
- MAGIDSON, V., O'CONNELL, C. B., LONCAREK, J., PAUL, R., MOGILNER, A. & KHODJAKOV, A. 2011. The spatial arrangement of chromosomes during prometaphase facilitates spindle assembly. *Cell*, 146, 555-67.
- MAIATO, H., DELUCA, J., SALMON, E. D. & EARNSHAW, W. C. 2004. The dynamic kinetochore-microtubule interface. *J Cell Sci*, 117, 5461-77.
- MANDELL, D. J., COUTSIAS, E. A. & KORTEMME, T. 2009. Sub-angstrom accuracy in protein loop reconstruction by robotics-inspired conformational sampling. *Nat Meth*, 6, 551-552.
- MCEWEN, B. F., HEAGLE, A. B., CASSELS, G. O., BUTTLE, K. F. & RIEDER, C. L. 1997. Kinetochore fiber maturation in PtK1 cells and its implications for the mechanisms of chromosome congression and anaphase onset. *J Cell Biol*, 137, 1567-80.
- NICKLAS, R. B. & KOCH, C. A. 1969. Chromosome micromanipulation. 3. Spindle fiber tension and the reorientation of mal-oriented chromosomes. *J Cell Biol*, 43, 40-50.
- NICKLAS, R. B. & WARD, S. C. 1994. Elements of error correction in mitosis: microtubule capture, release, and tension. *J Cell Biol*, 126, 1241-53.
- NIVÓN, L. G., MORETTI, R. & BAKER, D. 2013. A Pareto-Optimal Refinement Method for Protein Design Scaffolds. *PLOS ONE*, 8, e59004.
- PELLETIER, V., GAL, N., FOURNIER, P. & KILFOIL, M. L. 2009. Microrheology of microtubule solutions and actin-microtubule composite networks. *Phys Rev Lett*, 102, 188303.



- PETRASEK, Z. & SCHWILLE, P. 2008. Precise measurement of diffusion coefficients using scanning fluorescence correlation spectroscopy. *Biophys J*, 94, 1437-48.
- POSCH, M., KHOUDOLI, G. A., SWIFT, S., KING, E. M., DELUCA, J. G. & SWEDLOW, J. R. 2010. Sds22 regulates aurora B activity and microtubule-kinetochore interactions at mitosis. *J Cell Biol*, 191, 61-74.
- RAN, F. A., HSU, P. D., WRIGHT, J., AGARWALA, V., SCOTT, D. A. & ZHANG, F. 2013. Genome engineering using the CRISPR-Cas9 system. *Nat Protoc*, 8, 2281-308.
- RIEDER, C. L. 1982. The formation, structure, and composition of the mammalian kinetochore and kinetochore fiber. *Int Rev Cytol*, 79, 1-58.
- ROSASCO-NITCHER, S. E., LAN, W., KHORASANIZADEH, S. & STUKENBERG, P. T. 2008. Centromeric Aurora-B activation requires TD-60, microtubules, and substrate priming phosphorylation. *Science*, 319, 469-72.
- ROWLEY, M. I., COOLEN, A. C., VOJNOVIC, B. & BARBER, P. R. 2016. Robust Bayesian Fluorescence Lifetime Estimation, Decay Model Selection and Instrument Response Determination for Low-Intensity FLIM Imaging. *PLoS One*, 11, e0158404.
- SALIMIAN, K. J., BALLISTER, E. R., SMOAK, E. M., WOOD, S., PANCHENKO, T., LAMPSON, M. A. & BLACK, B. E. 2011. Feedback control in sensing chromosome biorientation by the Aurora B kinase. *Curr Biol*, 21, 1158-65.
- SANTAGUIDA, S. & AMON, A. 2015. Short- and long-term effects of chromosome mis-segregation and aneuploidy. *Nat Rev Mol Cell Biol*, 16, 473-85.
- SESSA, F., MAPELLI, M., CIFERRI, C., TARRICONE, C., ARECES, L. B., SCHNEIDER, T. R., STUKENBERG, P. T. & MUSACCHIO, A. 2005. Mechanism of Aurora B activation by INCENP and inhibition by hesperadin. *Mol Cell*, 18, 379-91.
- SHANER, N. C., LAMBERT, G. G., CHAMMAS, A., NI, Y., CRANFILL, P. J., BAIRD, M. A., SELL, B. R., ALLEN, J. R., DAY, R. N., ISRAELSSON, M., DAVIDSON, M. W. & WANG, J. 2013. A bright monomeric green fluorescent protein derived from Branchiostoma lanceolatum. *Nat Methods*, 10, 407-9.
- SKOUFIAS, D. A., DEBONIS, S., SAOUDI, Y., LEBEAU, L., CREVEL, I., CROSS, R., WADE, R. H., HACKNEY, D. & KOZIELSKI, F. 2006. S-trityl-L-cysteine is a reversible, tight binding inhibitor of the human kinesin Eg5 that specifically blocks mitotic progression. *J Biol Chem*, 281, 17559-69.
- SUZUKI, A., BADGER, B. L. & SALMON, E. D. 2015. A quantitative description of Ndc80 complex linkage to human kinetochores. *Nat Commun*, 6, 8161.
- TANAKA, T. U., RACHIDI, N., JANKE, C., PEREIRA, G., GALOVA, M., SCHIEBEL, E., STARK, M. J. & NASMYTH, K. 2002. Evidence that the Ipl1-Sli15 (Aurora kinase-INCENP) complex promotes chromosome bi-orientation by altering kinetochore-spindle pole connections. *Cell*, 108, 317-29.

- TAUCHMAN, E. C., BOEHM, F. J. & DELUCA, J. G. 2015. Stable kinetochore-microtubule attachment is sufficient to silence the spindle assembly checkpoint in human cells. *Nat Commun*, 6, 10036.
- THURBER, G. M., REINER, T., YANG, K. S., KOHLER, R. H. & WEISSLEDER, R. 2014. Effect of small-molecule modification on single-cell pharmacokinetics of PARP inhibitors. *Mol Cancer Ther*, 13, 986-95.
- TIRNAUER, J. S., CANMAN, J. C., SALMON, E. D. & MITCHISON, T. J. 2002. EB1 targets to kinetochores with attached, polymerizing microtubules. *Mol Biol Cell*, 13, 4308-16.
- VITALIS, A. & PAPPU, R. V. 2009a. ABSINTH: A new continuum solvation model for simulations of polypeptides in aqueous solutions. *Journal of Computational Chemistry*, 30, 673-699.
- VITALIS, A. & PAPPU, R. V. 2009b. Chapter 3 Methods for Monte Carlo Simulations of Biomacromolecules. In: RALPH, A. W. (ed.) *Annual Reports in Computational Chemistry*. Elsevier.
- WANG, F., ULYANOVA, N. P., DAUM, J. R., PATNAIK, D., KATENEVA, A. V., GORBSKY, G. J. & HIGGINS, J. M. 2012. Haspin inhibitors reveal centromeric functions of Aurora B in chromosome segregation. *J Cell Biol*, 199, 251-68.
- XU, Z., VAGNARELLI, P., OGAWA, H., SAMEJIMA, K. & EARNSHAW, W. C. 2010. Gradient of increasing Aurora B kinase activity is required for cells to execute mitosis. *J Biol Chem*, 285, 40163-70.
- YOO, T. Y., CHOI, J., YU, C., PAPPU, R. V. & NEEDLEMAN, D. J. Data from: Measuring NDC80 binding reveals the molecular basis of tension-dependent kinetochore-microtubule attachments. Dryad Data Repository.
- YOO, T. Y. & NEEDLEMAN, D. J. 2016. Studying Kinetochores In Vivo Using FLIM-FRET. *Methods Mol Biol*, 1413, 169-86.
- ZAYTSEV, A. V., MICK, J. E., MASLENNIKOV, E., NIKASHIN, B., DELUCA, J. G. & GRISHCHUK, E. L. 2015. Multisite phosphorylation of the NDC80 complex gradually tunes its microtubule-binding affinity. *Mol Biol Cell*, 26, 1829-44.
- ZAYTSEV, A. V., SEGURA-PENA, D., GODZI, M., CALDERON, A., BALLISTER, E. R., STAMATOV, R., MAYO, A. M., PETERSON, L., BLACK, B. E., ATAULLAKHANOV, F. I., LAMPSON, M. A. & GRISHCHUK, E. L. 2016. Bistability of a coupled Aurora B kinase-phosphatase system in cell division. *Elife*, 5, e10644.
- ZAYTSEV, A. V., SUNDIN, L. J., DELUCA, K. F., GRISHCHUK, E. L. & DELUCA, J. G. 2014. Accurate phosphoregulation of kinetochore-microtubule affinity requires unconstrained molecular interactions. *J Cell Biol*, 206, 45-59.
- ZHAI, Y., KRONEBUSCH, P. J. & BORISY, G. G. 1995. Kinetochore microtubule dynamics and the metaphase-anaphase transition. *J Cell Biol*, 131, 721-34.
- ZHANG, R., ALUSHIN, G. M., BROWN, A. & NOGALES, E. 2015. Mechanistic Origin of Microtubule Dynamic Instability and Its Modulation by EB Proteins. *Cell*, 162, 849-59.



## SUPPLEMENTAL FIGURES

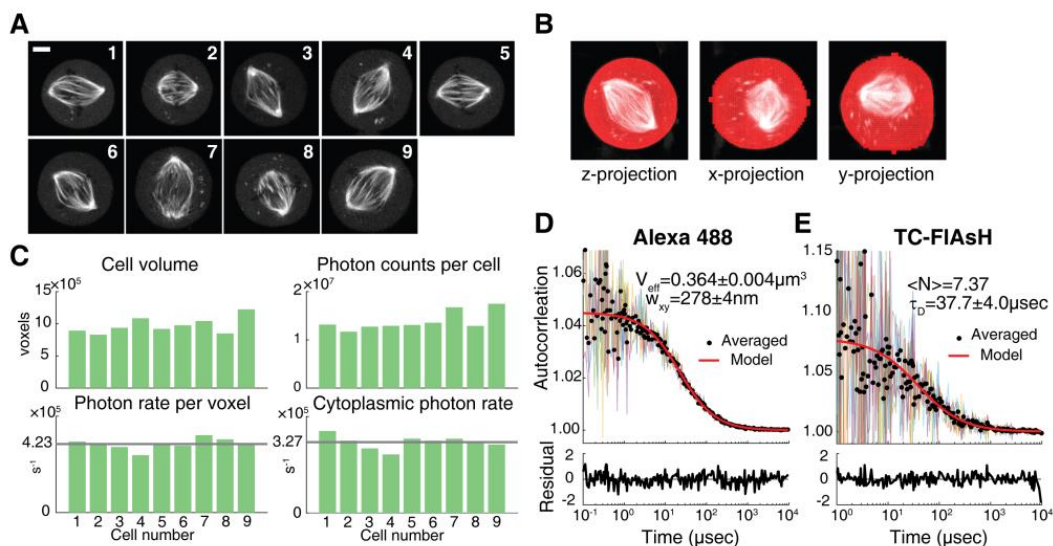

### Figure 1–figure supplement 1. $\beta$ -tubulin labeling fraction measurement

(A) Two-photon fluorescent microscopy images of 9 mitotic cells with  $\beta$ -tubulin-TC-FIAsH. 5  $\mu\text{m}$  scale bar.

(B) Example 3D segmentation using active contour algorithm.

(C) (top left) The number of voxels in segmented 3D cell images, (top right) the total number of photons collected from entire cells, (bottom left) the total number of photons divided by the number of voxels and the measurement time, and (bottom right) the number of photons collected per second at a voxel in the cytoplasmic region. Gray lines are the average over the 9 different cells.

(D) and (E) FCS measurements on Alexa Fluor 488 and TC-FIAsH in solution, respectively. Black circles are averages over 5 or 6 autocorrelation functions, and red lines are a single-component FCS model fit to the averages. Corresponding weighted residuals (the difference between data and model, divided by the standard deviation of data) are plotted below to show any systematic deviations of the fitted models from the data.

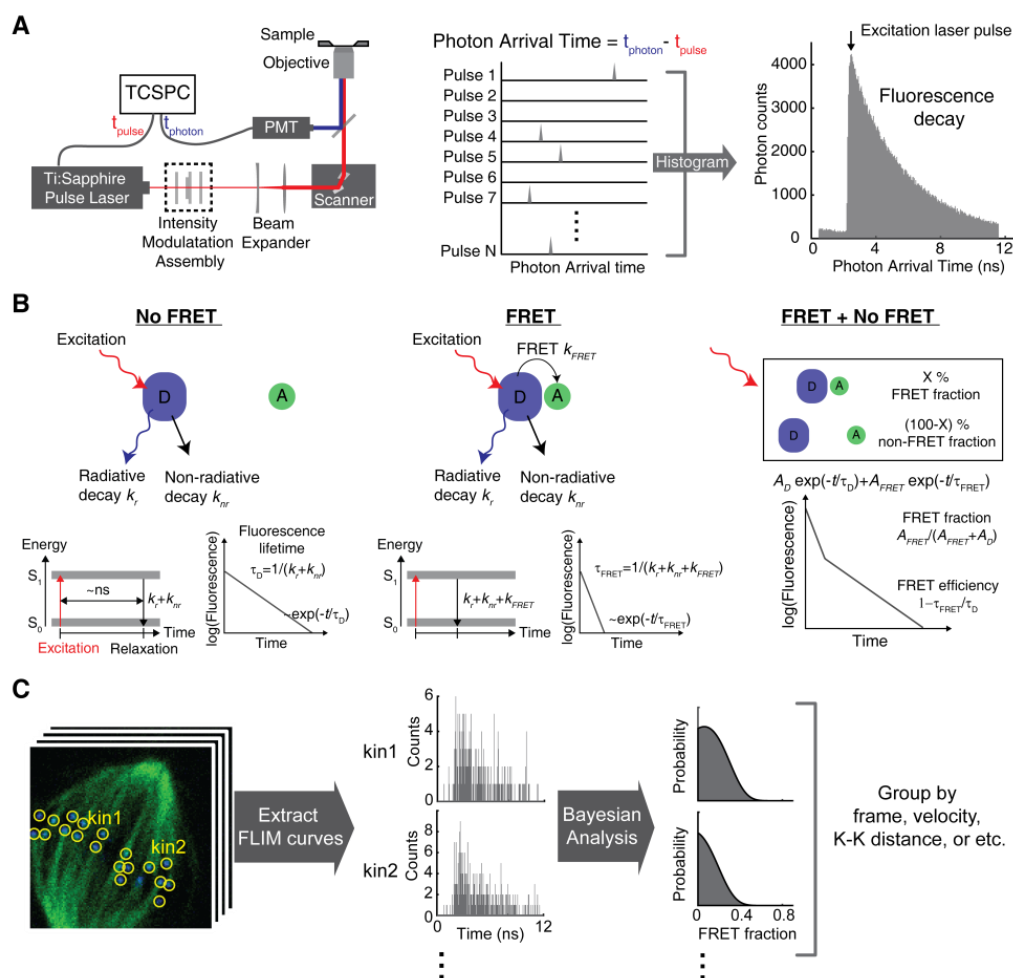

**Figure 1—figure supplement 2. Kinetochores FLIM-FRET measurement**

(A) Illustration of fluorescence decay acquisition in a TCSPC (time-correlated single photon counting) FLIM system. A Ti:Sapphire pulsed laser is used for excitation and a photomultiplier tube (PMT) for detection. The photon arrival time, the difference in timing between the emitted photon and excitation laser pulse, is measured by TCSPC, which is accumulated to a fluorescence decay curve over many laser repetition periods.

(B) The fluorescence lifetime is the average time the fluorophore stays in the excited state. (left) When the donor fluorophore (D) is not engaged in FRET with an acceptor (A) fluorophore, the donor fluorophore has a single-exponential fluorescence decay with fluorescence lifetime  $\tau_D = 1/(k_r + k_{nr})$ , where  $k_r$  and  $k_{nr}$  are the radiative and non-radiative decay rates, respectively. (middle) FRET provides an additional relaxation pathway to the excited donor, reducing the fluorescence lifetime of the donor to  $\tau_{FRET} = 1/(k_r + k_{nr} + k_{FRET})$ , where  $k_{FRET}$  is the FRET rate. (right) The fluorescence decay of a mixture of donors engaged in FRET and not engaged in FRET is a sum of two exponentials with two different lifetimes,  $\tau_D$  and  $\tau_{FRET}$ , which corresponds to the non-FRET and FRET populations, respectively. The relative amplitude of the short-lifetime exponential decay provides the fraction of the FRET population, and the lifetime ratio provides the intrinsic FRET efficiency.

(C) TCSPC FLIM provides fluorescence decay curve at each pixel, and the total photon counts in each pixel provides a two-photon fluorescence intensity image. To quantify the FRET fraction at each kinetochore, kinetochores were identified based on the intensity image, then the fluorescence decay curves in the pixels within each kinetochore were summed. Then we performed a Bayesian analysis to

obtain the posterior distribution of the FRET fraction at each kinetochore. The posterior distributions of the kinetochores in a group of kinetochores were combined by multiplication to compute the mean and SEM of the FRET fraction for the group.

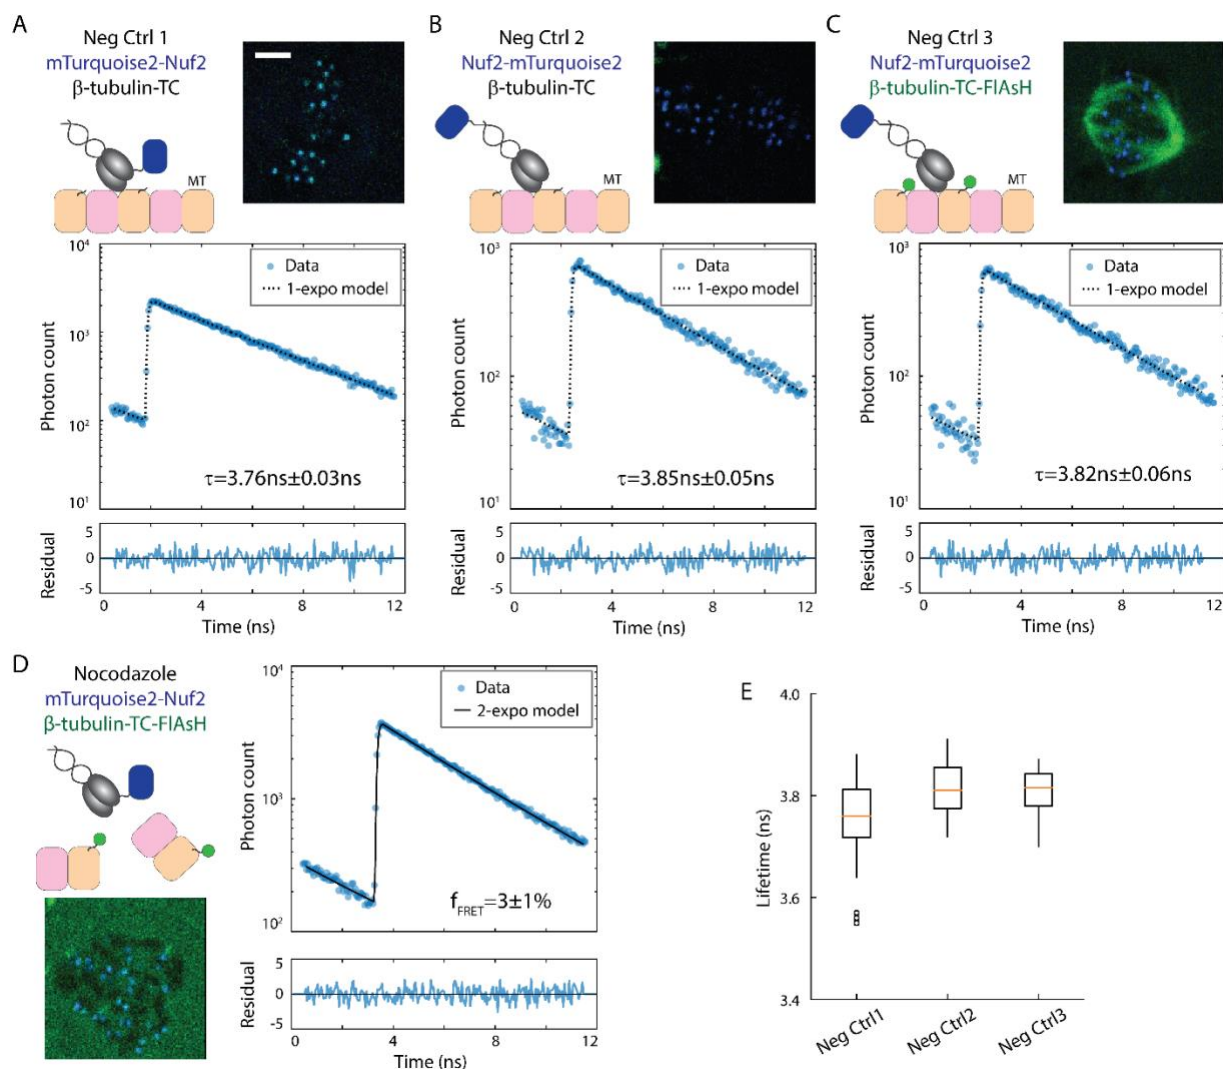

**Figure 1—figure supplement 3. Negative control data for NDC80-kMT FLIM-FRET measurements**

(A) to (D) Schematic descriptions, example cell images, and example mTurquoise2 fluorescence decay curves from three different FRET-negative control experiments and a nocodazole treatment experiment. mTurquoise2 fluorescence decay curves (blue circles) are plotted with best-fit single- (black dotted line) or two-exponential decay model (black solid line), and the associated weighted residuals are plotted below (blue curve). 3  $\mu$ m scale bar.

(A) Negative control 1. Nuf2 N-terminally labeled with mTurquoise2, and no FIAsH labeling.

(B) Negative control 2. Nuf2 C-terminally labeled with mTurquoise2 (far from kMT), and no FIAsH labeling.

(C) Negative control 3. Nuf2 C-terminally labeled with mTurquoise2 (far from kMT), and  $\beta$ -tubulin C-terminally labeled with FIAsH.

(D) Nocodazole treatment experiment. Nuf2 N-terminally labeled with mTurquoise2, and  $\beta$ -tubulin C-terminally labeled with FIAsH. Cell was incubated with 5  $\mu$ M nocodazole for >10 minutes to depolymerize microtubules.

(E) Boxplot of fluorescence lifetimes estimated from single-exponential models fit to the negative control fluorescence decays.  $n = 32, 11,$  and  $6$  cells for Neg Ctrl 1, 2, and 3, respectively.

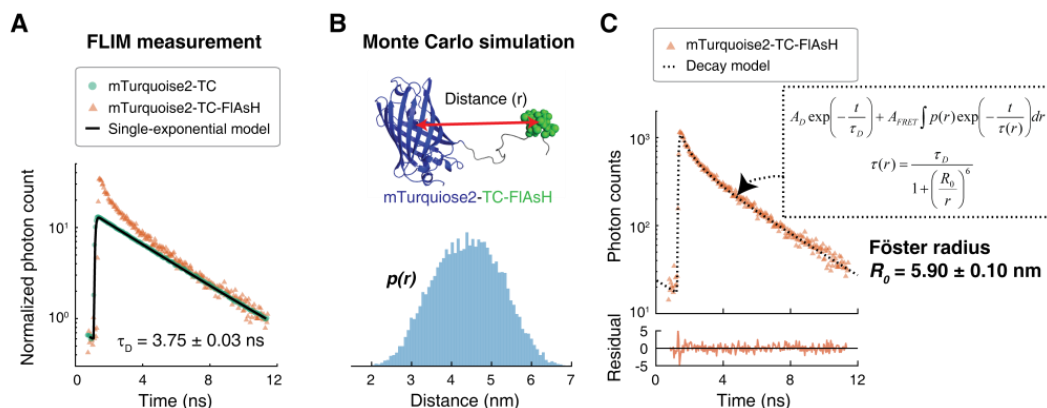

**Figure 1—figure supplement 4. Förster radius estimation by FLIM-FRET measurements and Monte Carlo protein simulations**

(A) Fluorescence decay curves of cells expressing mTurquoise2-TC in the absence (green circle) and the presence (orange triangle) of FIAsH. A single-exponential model (black solid line) was fit to the fluorescence decay curve in the absence of FIAsH. For easier comparison, the fluorescence decay curves were normalized such that they asymptotically overlap.

(B) The conformational ensemble of the flexible tether between mTurquoise2 and TC were modeled by Monte Carlo protein simulations, and the distance,  $r$ , between mTurquoise2 (blue cartoon) and TC-FIAsH (green ball) was estimated. This distribution is denoted by  $p(r)$ .

(C) The measured fluorescence decay of mTurquoise2-TC-FIAsH (orange triangles, same as (A) but not normalized) plotted with the best-fit decay model (black dotted line, model described in the box and derived in Materials and Methods). Associated weighted residual (deviation of model from data, divided by the square root of the number of photons) plotted below. Fitting the decay model to the data estimated the Förster radius to be  $5.90 \text{ nm} \pm 0.10 \text{ nm}$  (SE).



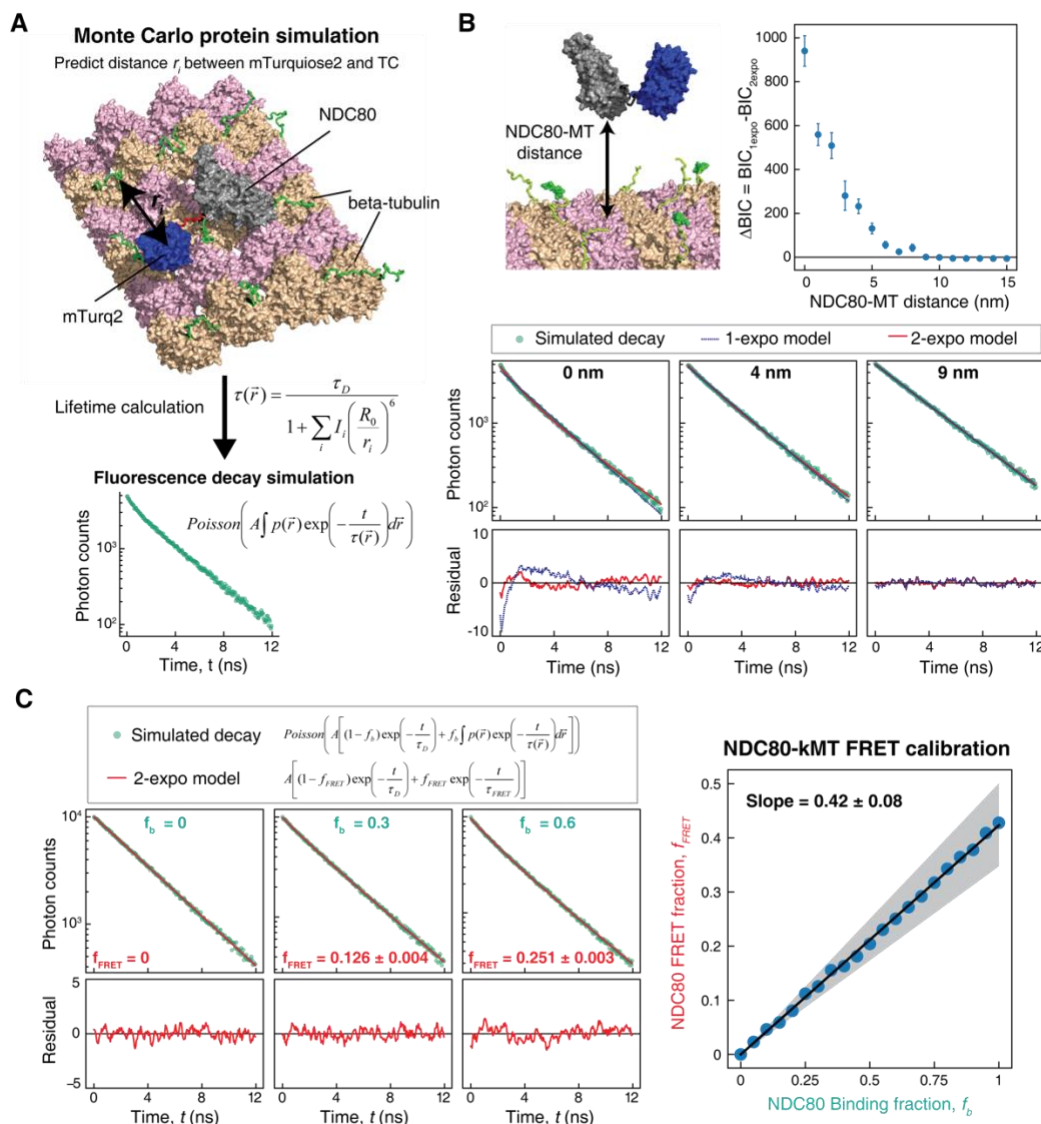

### Figure 1—figure supplement 5. Characterization and calibration of NDC80-kMT FLIM-FRET measurement

(A) The conformational ensemble of the flexible tether between mTurquoise2 and Nuf2 (red) and the disordered C-terminal tails of beta-tubulins around the NDC80 (green) were modeled by large-scale Monte Carlo protein simulations, which were then used to calculate the distances,  $r_i$ , between the mTurquoise2 and the TC motifs. FLAsH labeling was assigned to the TC motifs with 26.1% probability (which is the measured labeling fraction of beta-tubulin). Fluorescence lifetimes of the mTurquoise2 were calculated for randomly sampled sets of distances,  $\vec{r} = (r_i)$ , based on which fluorescence decay curves were simulated.

(B) (top) Fluorescence decay curves for various distances between NDC80 and MT were simulated and then were fit using single- and two-exponential decay models. Difference in Bayesian information criteria (BIC) between single- and double-exponential models is plotted against the NDC80-MT distance. Data points are mean and SD. (bottom) Example simulated fluorescence decay curves (green dots) for 0, 4, and 9 nm NDC80-MT distances are plotted with the best-fit single- (blue line) and two-exponential (red line) models. Corresponding smoothed weighted residuals plotted below.

(C) Fluorescence decay curves for various NDC80 binding fractions ( $f_b$ ) were simulated and fit by using two-exponential decay model to estimate FRET fraction ( $f_{FRET}$ ). (left) Three example simulated fluorescence decay curves (green dots) for 0%, 30%, and 60% binding fractions with the best-fit two-exponential models (red line), and the corresponding smoothed weighted residuals plotted below. (right) NDC80 FRET fractions ( $f_{FRET}$ ) plotted against NDC80 binding fractions ( $f_b$ ) (blue dots), and the linear fit (black line). Gray shaded area represents the uncertainty in the slope, which was determined from the uncertainties in the measured beta-tubulin labeling fraction and Förster radius (see Supplemental experiments in Materials and Methods).

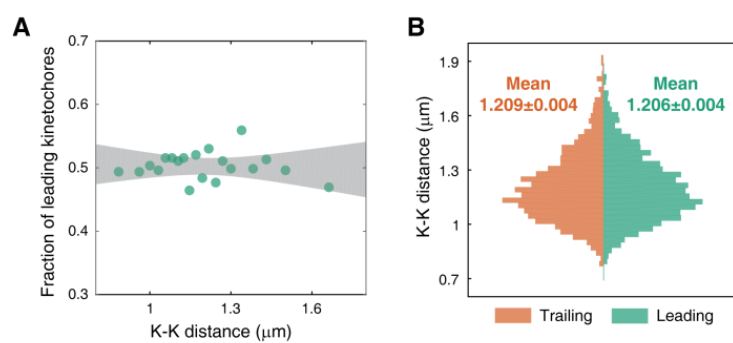

**Figure 3—figure supplement 1. K-K distance and kinetochore velocity are not correlated**

(A) Each data point represents the fraction of leading kinetochores within a group of kinetochores with similar K-K distances. Gray region is the 95% confidence interval of the linear fit.

(B) Histogram of K-K distances of leading (green) and trailing (orange) kinetochores.

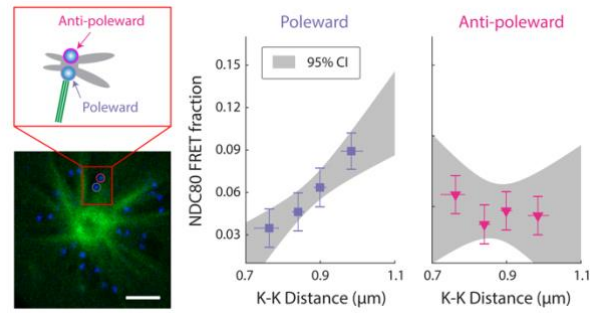

**Figure 3–figure supplement 2. NDC80 FRET fraction of poleward- and anti-poleward-facing kinetochores in STLC-treated cells with monopolar spindles**

NDC80 FRET fraction vs. K-K distance for poleward-facing kinetochores (purple square, same as Figure 3D) and anti-poleward-facing kinetochores (pink triangles) in cells treated with 5 μM STLC (n = 16 cells, 493 kinetochores/data point). Data points are the mean, y-error bars the SEM, and the x-error bars the interquartile ranges within groups of kinetochores with similar K-K distances. 3 μm scale bar. Gray area is the 95% confidence interval for the linear fit.

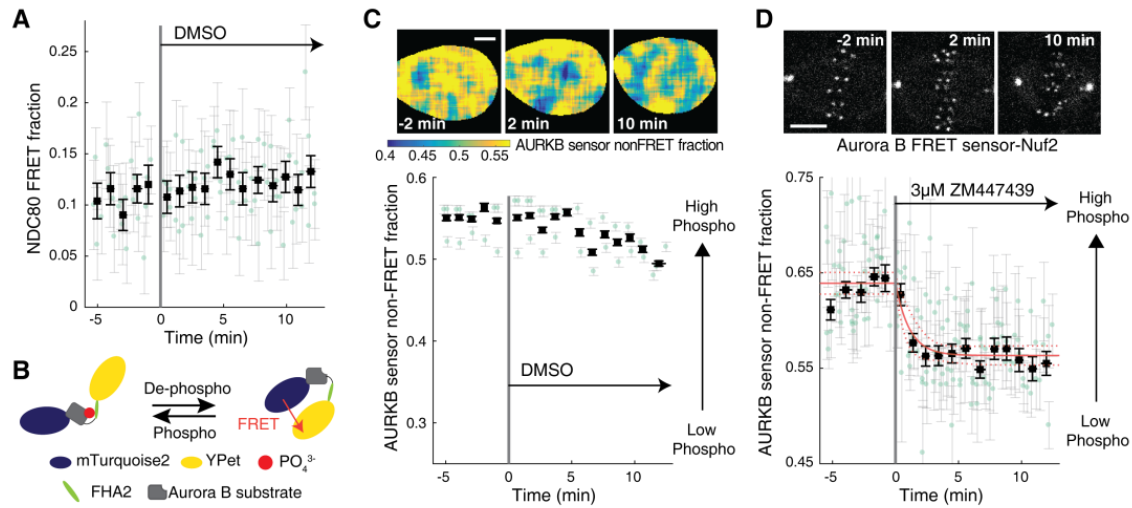

**Figure 4-figure supplement 1. Supplemental data for Aurora B inhibition experiments**

(A) Time course of NDC80 FRET fraction in response to 0.03% DMSO (n = 5 cells, negative control for Figure 4A).

(B) The design of Aurora B FRET biosensor. The FRET sensor contains a kinesin-13 family Aurora B substrate (gray) whose phosphorylation results in its binding to the forkhead-associated domain (FHA2, green) in the sensor, which constrains the sensor in the open non-FRET state. Therefore, measuring the non-FRET fraction of the FRET sensor allows the quantification of Aurora B activity.

(C) Time course of the non-FRET fraction of cytoplasmic Aurora B FRET sensor in response to 0.03% DMSO (n = 3 cells, negative control for Figure 4E).

(D) Time course of the non-FRET fraction of Nuf2-targeted Aurora B FRET sensor in response to 3 μM ZM447439 (n = 9 cells). Black squares and error bars are the weighted mean and SEM of the data points (green circles) in equally spaced time intervals of 1 minute. Red solid and dashed lines are the best-fit exponential model and its 95% confidence interval, respectively. 5 μm scale bars.

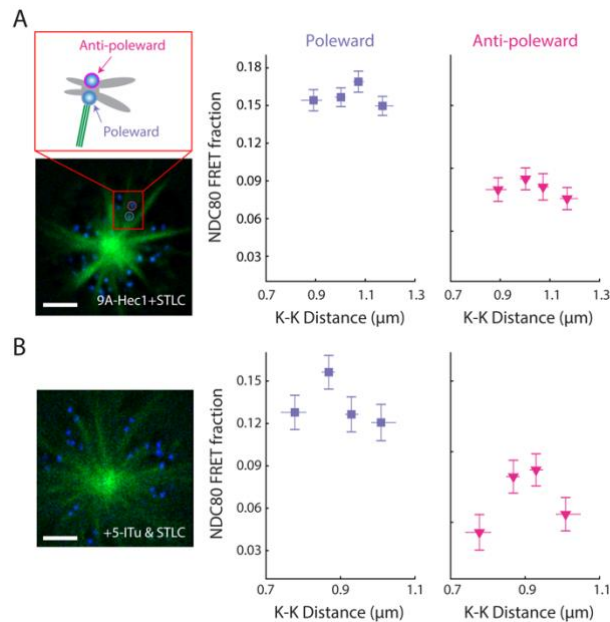

**Figure 5–figure supplement 1. NDC80 FRET fraction of poleward and anti-poleward kinetochores in STLC-induced monopolar spindles of 9A-Hec1-expressing cells and haspin inhibited cells.** NDC80 FRET fraction vs. K-K distance for poleward-facing kinetochores (purple squares, same as Figure 5) and anti-poleward-facing kinetochores (pink triangles) in (A) 9A-Hec1-expressing cells treated with 5  $\mu\text{M}$  STLC (n=10 cells, 855 kinetochores/data point) and (B) endogenous-Hec1-expressing cells treated both with 10  $\mu\text{M}$  5-ITu and 5  $\mu\text{M}$  STLC (n = 12 cells, 564 kinetochores/data point). Data points are the mean, y-error bars the SEM, and the x-error bars the interquartile ranges within groups of kinetochores with similar K-K distances. 3  $\mu\text{m}$  scale bar.
